1 **Fidelity varies in the symbiosis between a gutless marine worm and its microbial consortium**

2

3 Yui Sato\*<sup>1</sup>, Juliane Wippler<sup>1</sup>, Cecilia Wentrup<sup>1</sup>, Rebecca Ansoerge<sup>1,2</sup>, Miriam Sadowski<sup>1</sup>, Harald

4 Gruber-Vodicka<sup>1</sup>, Nicole Dubilier\*<sup>1</sup>, Manuel Kleiner\*<sup>3</sup>

5 <sup>1</sup>Max Planck Institute for Marine Microbiology, Celsiusstr. 1, D-28359 Bremen, Germany

6 <sup>2</sup>Quadram Institute Bioscience, Gut Microbes and Health Programme, Norwich NR4 7UQ, UK

7 <sup>3</sup>North Carolina State University, Department of Plant and Microbial Biology, Raleigh, North Carolina 27695, USA

8

9 **\*Corresponding authors:**

10 Yui Sato: ysato@mpi-bremen.de, phone +49 (421) 2028-8240

11 Nicole Dubilier: ndubilie@mpi-bremen.de, phone +49 (421) 2028 9320

12 Manuel Kleiner: manuel\_kleiner@ncsu.edu, phone +1 919 515 3792

13

14 **Keywords:** microbiome, microbiota, animal-bacterial symbiosis, partner fidelity, specificity, symbiont

15 transmission, phyllosymbiosis, single nucleotide polymorphisms (SNPs), intraspecific genetic variation

## 16 **Abstract**

17 In obligate symbioses, partner fidelity plays a central role in maintaining the association over evolutionary  
18 time. Fidelity has been well studied in hosts with only a few symbionts, but little is known about how  
19 fidelity is maintained in obligate associations with multiple co-occurring symbionts. Here, we show that  
20 partner fidelity varies from strict to absent in a gutless marine annelid and its consortium of co-occurring  
21 symbionts that provide it with nutrition. We sequenced the metagenomes of 80 *Olavius algarvensis*  
22 individuals from the Mediterranean, and compared host mitochondrial and symbiont phylogenies based on  
23 single nucleotide polymorphisms across genomes, using a low-coverage sequencing approach that has not  
24 yet been applied to microbial community analyses. Fidelity was strongest for the two chemoautotrophic,  
25 sulphur-oxidizing symbionts that dominated the microbial consortium in all host individuals. In contrast,  
26 fidelity was only intermediate to absent in the sulphate-reducing and spirochaetal symbionts, which  
27 occurred in lower abundance and were not always present in all host individuals. We propose that variable  
28 degrees of fidelity are advantageous for these hosts by allowing the faithful transmission of their  
29 nutritionally most important symbionts and flexibility in the acquisition of other symbionts that promote  
30 ecological plasticity in the acquisition of environmental resources.

31

## 32 **Introduction**

33 Beneficial associations between eukaryotic hosts and bacterial partners are ubiquitous, but how these  
34 persist stably over evolutionary time remains a source of debate<sup>1-3</sup>. One of the factors that plays a central  
35 role in maintaining beneficial symbioses is partner fidelity, defined as the stability of the association  
36 between a host and its symbiont over multiple host generations<sup>4</sup> (see Box 1). In associations with strict  
37 fidelity, genetic variants of hosts and symbionts show phylogenetic concordance. Strict fidelity is favoured  
38 in associations in which the symbionts are transmitted vertically, that is directly from hosts to their  
39 offspring. However, fidelity in vertically transmitted symbioses can be disrupted by host switching,  
40 symbiont displacement, acquisition of novel symbionts from free-living microorganisms and symbiont loss.  
41 Fidelity is generally weaker in associations with horizontal symbiont transmission in which the symbionts  
42 are acquired from free-living microbial populations or co-occurring hosts<sup>4,5</sup>. However, strong fidelity can

43 also occur in symbioses with horizontal transmission if genotype-dependent partner choice ensures the  
44 faithfulness of the association<sup>4</sup>.

45

46 **Box 1: Definition of key terms used in this study.** As many of the terms below are used inconsistently in the  
47 literature, we explain here how we interpret them.

48

49 **Vertical transmission:** The direct transmission of a symbiont from a parent to its offspring. In most  
50 symbioses the transmission is from mother to offspring (maternal), but there are  
51 cases of paternal transmission<sup>6,7</sup>.

52 **Horizontal transmission:** The transmission of a symbiont to a host from the environment or a co-  
53 occurring host<sup>6</sup>.

54 **Mixed-mode transmission:** The transmission of a symbiont by vertical transmission mixed with occasional  
55 or frequent events of horizontal transmission over evolutionary time<sup>5</sup>. Note that  
56 the transmission of a symbiont community from one generation to the next in  
57 which some members are transmitted vertically and others horizontally is not  
58 meant here when using this term.

59 **Partner fidelity:** The stability of the association between host and symbiont genotypes over  
60 multiple host generations<sup>8</sup>. Partner fidelity is generated by vertical symbiont  
61 transmission, or genotype-dependent partner choice in horizontal symbiont  
62 transmission<sup>4</sup>. In this study, we used congruent phylogenies of host  
63 mitochondrial genomes and symbiont genomes as an indicator of partner  
64 fidelity.

65 **Partner choice:** The ability of hosts, symbionts or both to preferentially choose their partner.  
66 Partner choice describes interactions between individual partners within their  
67 lifetime, and is distinct from partner fidelity requiring repeated interactions over  
68 evolutionary time<sup>8,9</sup>.

69 **Partner specificity:** The taxonomic range of partners in an association<sup>10</sup>. Symbiont specificity is  
70 defined as the range of symbionts with which a host associates, while host  
71 specificity is defined as the range of hosts with which a symbiont associates. In  
72 this study, we distinguish partner specificity from partner fidelity, as the former  
73 measures the possible diversity of host-symbiont associations, but not the  
74 stability of each association.

75 **Co-inheritance:** The transmission of two or more traits from a host parent to its offspring. Traits  
76 can include any combination of phenotypes, genes, alleles, organelles and  
77 symbionts. In this study, we use the term to describe the co-inheritance of  
78 mitochondria and symbionts from parents to their offspring.

79 **Phylosymbiosis:** Microbial community relationships that recapitulate the phylogeny of their  
80 hosts<sup>11</sup>. Phylosymbiosis tests how similar the composition of microbial  
81 communities is to the phylogeny of host species, and can arise through  
82 ecological or evolutionary forces. Phylosymbiosis differs from partner fidelity in  
83 that the structure of the microbial community is analysed, not the phylogeny of  
84 each symbiont taxon.

85 **Microevolution:** Evolutionary change in a population over short time scales, and generally  
86 applied to evolution within a species or conspecific populations.

87 **Macroevolution:** Evolutionary change over longer time scales, and generally applied to evolution  
88 across species and higher taxonomic groups.

89 Partner fidelity has been well studied in obligate associations with only one or a few symbionts, such  
90 as aphids<sup>12-15</sup>, tsetse flies<sup>16</sup>, *Riftia* tube worms<sup>17</sup>, Vesicomylidae clams<sup>18-20</sup>, *Solemya* clams<sup>21</sup>, and the  
91 Hawaiian bobtail squid<sup>22</sup>. However, as the number and diversity of symbiont species in a host increases,  
92 revealing the patterns of partner fidelity over multiple host generations becomes more challenging<sup>4</sup>. In  
93 hosts with highly diverse microbiota, such as corals<sup>23,24</sup>, insects<sup>25-27</sup> and mammals<sup>28-30</sup>, phylogenetic  
94 analyses of microbial marker genes or parts of them, like the 16S rRNA gene, have been used to examine if  
95 the microbiome composition reflects the phylogeny of related host species, a pattern termed  
96 phylosymbiosis<sup>25</sup>. For a few insect and mammal host taxa, metagenomic analyses have allowed a higher  
97 resolution of host and microbiome genetic diversity and revealed phylosymbiosis at shorter evolutionary  
98 time scales within species<sup>26,28,31-33</sup>. However, phylosymbiosis is different from partner fidelity in that the  
99 structure of the microbial community is analysed, not the co-inheritance of symbiont and host genotypes  
100 (see Box 1). Identifying partner fidelity in hosts with highly diverse microbial communities is a challenge  
101 because the microbiota generally consist of hundreds to thousands of species and strains that can evolve  
102 rapidly and are in continual flux<sup>34</sup>. Well-characterized associations with a limited number and diversity of  
103 co-occurring symbionts are ideal for understanding how selective pressure affects different members of a  
104 symbiotic community. However, partner fidelity in a symbiosis with multiple, co-occurring symbionts has,  
105 to our knowledge, not yet been studied.

106 Gutless marine annelids offer a unique opportunity for studying partner fidelity in multi-member  
107 symbiont communities (Figure 1a). These worms from the subfamily Phalloporilinae (Clitellata, Naididae,  
108 genera *Olavius* and *Inanidrilus*; *sensu* Erséus *et al.*<sup>35</sup>) are regularly associated with at least three to seven  
109 symbiont species from different genera and phyla that co-occur within single host individuals<sup>36-43</sup>. The  
110 symbionts are harboured in an extracellular region immediately under the outer cuticle of the host (Figure  
111 1b). Over the estimated 50 million years these hosts have evolved from their gut-bearing ancestors<sup>44</sup>, they  
112 have become so fully dependent on their symbionts for both nutrition and recycling of their waste  
113 compounds that they no longer have a mouth, digestive tract and excretory system<sup>36-38,45</sup>. Symbiont  
114 transmission occurs vertically through smearing when the parents deposit their eggs in the sediment, based  
115 on transmission electron microscopy and fluorescence *in situ* hybridization (FISH) studies of three host  
116 species (*Inanidrilus leukodermatus*, *Olavius planus*, and *Olavius algarvensis*)<sup>43,46-48</sup>. However, given the

117 morphological similarity of several members of the bacterial symbiont community, these studies could not  
118 resolve if all symbionts are inherited through egg-smearing, or if some are acquired horizontally from the  
119 environment. Furthermore, there is evidence for host-switching and displacement in the dominant, sulphur-  
120 oxidizing symbiont *Candidatus Thiosymbion* over longer evolutionary time<sup>49,50</sup>.

121 In the best-studied gutless marine annelid, *O. algarvensis*, seven symbiont species have been  
122 identified – two sulphur-oxidizing Gammaproteobacteria: *Ca. Thiosymbion* and Gamma3; four sulphate-  
123 reducing Deltaproteobacteria: Delta1a, Delta1b, Delta3 and Delta4; and a spirochete<sup>36-39,51,52</sup>. Of these  
124 seven symbionts, not all consistently co-occur in all host individuals, but all hosts harbour the sulphur-  
125 oxidizing symbiont *Ca. Thiosymbion*, the sulphate-reducing Delta1a or Delta1b symbiont, and the  
126 spirochete<sup>39</sup>. The gammaproteobacterial, and possibly the deltaproteobacterial symbionts, autotrophically  
127 fix CO<sub>2</sub>, and engage in syntrophic cycling of oxidized and reduced sulphur compounds<sup>36,37,53</sup>. Nutrient  
128 transfer to the host occurs via phagolysosomal digestion of the symbionts in the epidermal cells underneath  
129 the symbiont layer<sup>54,55</sup>. Evidence from genomic, proteomic and stable isotope analyses indicate resource  
130 partitioning, with different symbiont species favouring different energy and carbon sources<sup>37,38,45,54</sup>. This  
131 metabolic niche differentiation among these co-occurring symbionts, together with the variability in their  
132 abundances across host individuals, indicate different levels of selective pressure, which could be reflected  
133 in varying degrees of partner fidelity<sup>56</sup>.

134 In this study, we examined partner fidelity in populations of *O. algarvensis* from two bays of the  
135 island of Elba, Italy, by analysing single nucleotide polymorphisms (SNPs) across 80 metagenomes. For  
136 the hosts, we analyzed the phylogeny of their mitochondrial genomes as indicators of vertical symbiont  
137 transmission. We then compared mitochondrial phylogeny with that of each symbiont to identify levels of  
138 congruence, and correspondingly fidelity, within the microbial consortium. We used a low-coverage  
139 sequencing approach for non-model organisms that has not yet been applied to host-microbe  
140 associations<sup>57,58</sup>, allowing the analysis of the entire microbial consortium, including low-abundance  
141 symbionts.

142

## 143 **Results**

### 144 **Two mitochondrial haplotypes dominated the host population**

145 To identify mitochondrial genetic diversity in the *O. algarvensis* population, we sequenced the  
 146 mitochondrial cytochrome c oxidase subunit I (COI) gene of 579 *O. algarvensis* individuals collected over  
 147 four years from two bays approximately 16 km apart on the island of Elba, Italy (Sant' Andrea and Cavoli;  
 148 Figure 1c and 1d). A haplotype network, based on 579 COI sequences of 525 bp, revealed two dominant  
 149 mitochondrial COI-haplotypes, here termed A and B, that co-occurred at both locations and were distinct  
 150 from each other by five nucleotides (Figure 1e). We sequenced the metagenomes of 20 individuals from the  
 151 two dominant A and B haplotypes from both locations (in total 80 metagenomes), and assembled complete  
 152 circular genomes of host mitochondria (mtDNA) from an arbitrarily-selected metagenome for A- and B-  
 153 haplotypes. The mtDNAs of A- and B-haplotypes shared 99.3% average nucleotide identity (ANI), and  
 154 encoded 13 protein-coding genes, 2 ribosomal RNAs, and 21 transfer RNAs (A = 15,715 bp and B =  
 155 15,730 bp). The close phylogenetic relatedness between these two host mitochondrial haplotypes that co-  
 156 occurred in both bays allowed us to examine the effects of both genetics and geographic location on partner  
 157 fidelity in *O. algarvensis*.

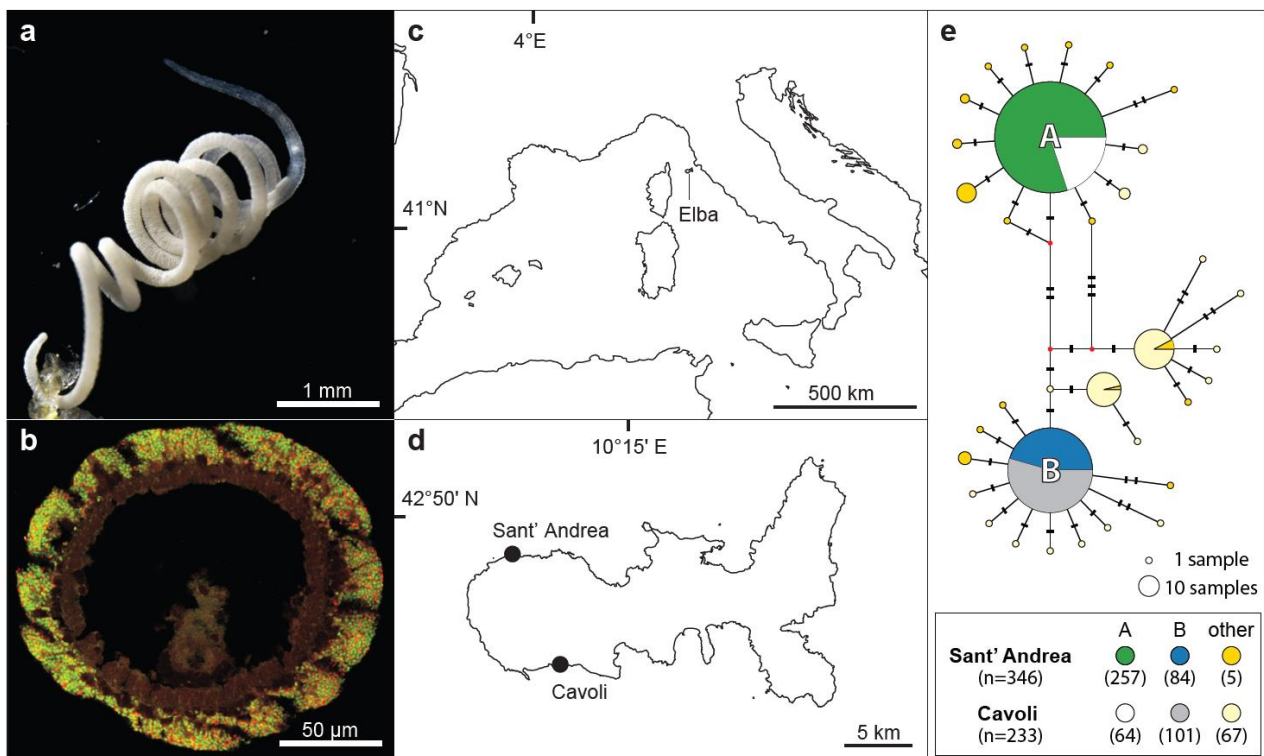

158 **Figure 1. The *O. algarvensis* population in two bays off the island of Elba was dominated by two mitochondrial haplotypes.**  
 159 (a) Light microscopy image of *Olavius algarvensis*, (b) Fluorescence *in situ* hybridization image of an *O. algarvensis* cross section,  
 160 highlighting the symbionts just below the cuticle of the host (gammaproteobacterial symbionts in green and deltaproteobacterial  
 161 symbionts in red, using general probes for these two phyla). Reproduced with permission from Kleiner *et al.*<sup>53</sup>. (c, d) Location of the  
 162 two collection sites, Sant' Andrea and Cavoli, two bays off the island of Elba in the Mediterranean. (e) Haplotype network of  
 163 mitochondrial cytochrome c oxidase subunit I gene sequences of *O. algarvensis* individuals from the two collection sites. The two  
 164 dominant haplotypes A and B co-occurred in both bays. The size of the pie charts corresponds to haplotype frequencies. Hatch marks  
 165 correspond to the number of point mutations between haplotypes. Nodes depicted by small red points indicate unobserved  
 166 intermediates predicted by the algorithm in the haplotype network software. The number of individuals identified as haplotype A or B in  
 167 each bay are in parentheses in the box below the network.  
 168

169 **Symbiont strain diversity was low within host individuals**

170 We assembled metagenome-assembled genomes (MAGs) for each of the seven symbionts in *O. algarvensis*  
171 and used them as references for SNP-based analyses (Supplementary Table S1; Supplementary Figures S1  
172 and S2). Symbiont strain diversity within single host individuals was low based on SNP densities in the  
173 seven symbiont genomes (0.02 – 0.49 SNP/kbp; Supplementary Table S2b). These values are lower than or  
174 comparable to SNP densities reported for vertically-transmitted endosymbionts in the shallow water  
175 bivalve *Solemya velum* (0.1 – 1 SNP/kbp)<sup>21</sup>, and considerably lower than SNP densities in horizontally-  
176 transmitted symbionts of the giant tubeworm *Riftia pachyptila* (2.9 SNP/kbp)<sup>59</sup> and deep-sea  
177 *Bathymodiolus* mussels (5 – 11 SNP/kbp)<sup>60</sup>. Since strain diversity was low within host individuals, we  
178 treated each symbiont within an *O. algarvensis* individual as a single genotype in the analyses described  
179 below.

180

181 **Sulphur-oxidizing, sulphate-reducing, and spirochete symbionts were found in all host individuals**

182 We assessed the relative abundance of symbionts within each of the 80 *O. algarvensis* individuals by  
183 quantifying sequencing read abundances for single-copy genes specific to each symbiont species (Figure 2;  
184 Supplementary text 1.1; 162 to 431 single-copy genes per symbiont species). The sulphur-oxidizing  
185 symbionts, *Ca. Thiosymbion* and Gamma3, as well as the spirochete, were present in all individuals  
186 (Figure 2a). All host individuals also always had sulphate-reducing symbionts (Delta1a, Delta1b, Delta3  
187 and Delta4), but these varied across host individuals and no individuals hosted all of them. Delta3 was  
188 detected in only six host individuals, making statistical tests meaningless, and therefore excluded from  
189 subsequent phylogenetic analyses.

190 Based on relative read abundances mapped to single-copy genes, *Ca. Thiosymbion* was the most  
191 abundant symbiont across host individuals ( $41.6 \pm 11.6\%$ ; mean  $\pm$  standard deviation; Figure 2b), while the  
192 abundance of Gamma3 symbiont reads varied considerably in host individuals from 0.1 to 61.2% ( $28.3 \pm$   
193  $11.3\%$ ). The summed relative abundances of the sulphur-oxidizing gammaproteobacteria ( $69.9 \pm 7.4\%$ ) and  
194 sulphate-reducing deltaproteobacteria ( $26.7 \pm 7.2\%$ ) showed consistent ratios across the 80 host  
195 individuals, regardless of the location, host COI-haplotype, or the combination of these two factors



196 (Supplementary Table S3). Read abundances of the spirochete symbiont were consistently low in host  
 197 individuals ( $3.4 \pm 2.7\%$ ), with one exception of 17.3%.

a

| COI-haplotype, location                              | Ca.Thiosym.             | Gamma3                  | Delta1a                | Delta1b                | Delta3               | Delta4                 | Spirochete              |
|------------------------------------------------------|-------------------------|-------------------------|------------------------|------------------------|----------------------|------------------------|-------------------------|
| <span style="color: green;">■</span> A, Sant' Andrea | 20/20<br>(100%)         | 20/20<br>(100%)         | 20/20<br>(100%)        | 0/20<br>(0%)           | 1/20<br>(5%)         | 20/20<br>(100%)        | 20/20<br>(100%)         |
| <span style="color: white;">□</span> A, Cavoli       | 20/20<br>(100%)         | 20/20<br>(100%)         | 20/20<br>(100%)        | 13/20<br>(65%)         | 3/20<br>(15%)        | 20/20<br>(100%)        | 20/20<br>(100%)         |
| <span style="color: blue;">■</span> B, Sant' Andrea  | 20/20<br>(100%)         | 20/20<br>(100%)         | 9/20<br>(45%)          | 16/20<br>(80%)         | 2/20<br>(10%)        | 17/20<br>(85%)         | 20/20<br>(100%)         |
| <span style="color: grey;">■</span> B, Cavoli        | 20/20<br>(100%)         | 20/20<br>(100%)         | 6/20<br>(30%)          | 20/20<br>(100%)        | 0/20<br>(0%)         | 20/20<br>(100%)        | 20/20<br>(100%)         |
| <b>Total</b>                                         | <b>80/80<br/>(100%)</b> | <b>80/80<br/>(100%)</b> | <b>55/80<br/>(69%)</b> | <b>49/80<br/>(61%)</b> | <b>6/80<br/>(8%)</b> | <b>77/80<br/>(96%)</b> | <b>80/80<br/>(100%)</b> |

b

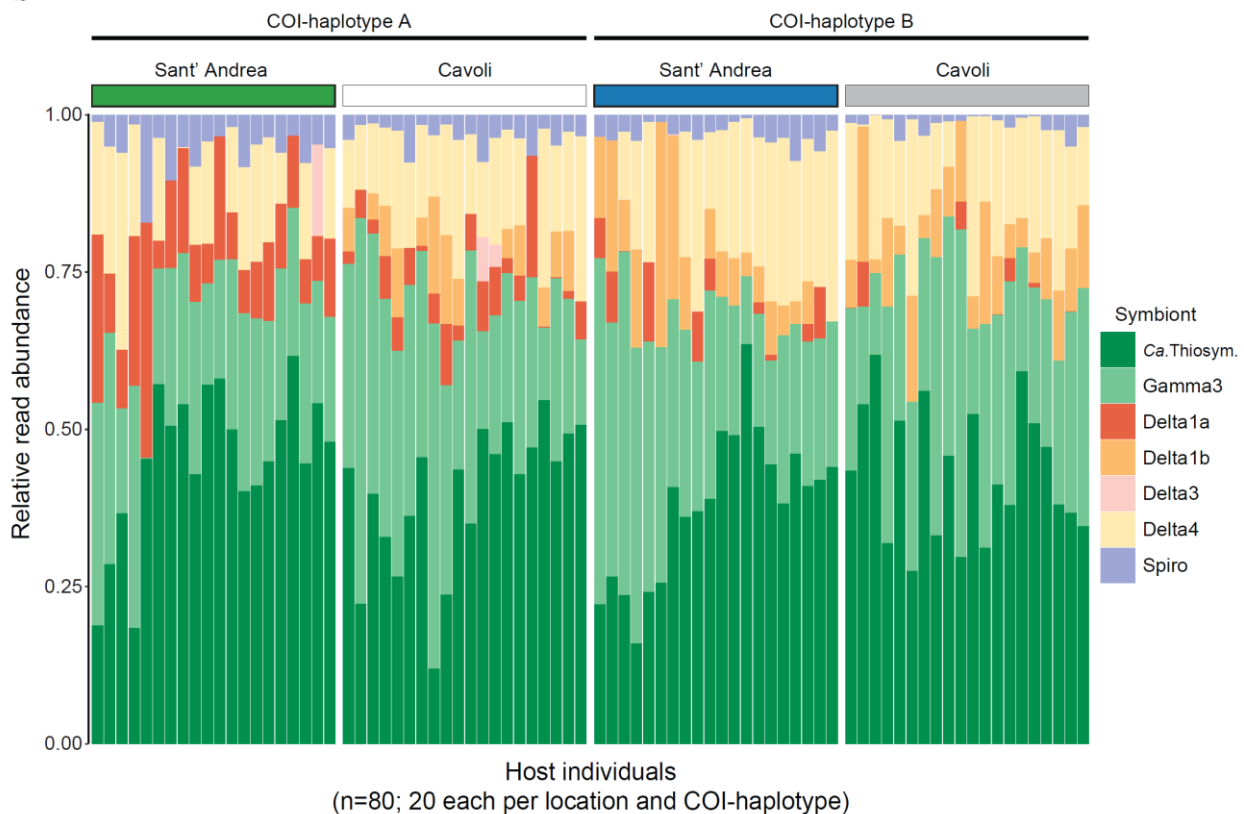

198

199 **Figure 2. The composition of the symbiont community in 80 *O. algarvensis* individuals.** (a) The number of *O. algarvensis* host  
 200 individuals from two mitochondrial lineages (COI-haplotypes A and B) and two locations (Sant' Andrea and Cavoli) in which the  
 201 respective symbiont species was detected ( $n = 80$  in total; 20 replicates per location and COI-haplotype; Supplementary text 1.1). (b)  
 202 Relative read abundances of symbionts in the 80 *O. algarvensis* individuals. Each column shows the reads from a single host  
 203 individual. The sulphur-oxidizing symbionts *Ca. Thiosymbion* (*Ca. Thiosym.*) and Gamma 3 were the most abundant across host  
 204 individuals, while the abundances of the sulphate-reducing symbionts (Delta1a, Delta1b, Delta3, Delta4) and the spirochete symbiont  
 205 (Spiro) were consistently lower. Relative abundances of each symbiont were estimated based on metagenomic sequencing reads that  
 206 mapped to the single-copy genes of each symbiont (Supplementary text 1.1). Relative symbiont abundances based on 16S rRNA  
 207 gene sequences in the metagenomes were similar (Supplementary text 1.2; Supplementary Figure S4).



208 **Probabilistic SNP-identification increased the number of hosts and SNP-sites for phylogenetic**  
209 **reconstruction of low-abundance symbionts**

210 Conventionally, SNPs in symbiont genomes are identified using a deterministic genotype-calling approach  
211 that requires a minimum read-coverage (e.g. at least five-fold<sup>61</sup>; Supplementary text 1.4). In our dataset,  
212 this coverage requirement excluded symbionts that occurred at low relative abundances (Supplementary  
213 Table 4a). In addition, the deterministic genotype-calling limits the number of available SNP-sites for  
214 phylogenetic inference, in our case to a maximum symbiont SNP density of 0.102 SNP/kbp (ranging from  
215 0.006 to 0.102 SNP/kbp; Supplementary Table 4b). To circumvent these limitations, we calculated  
216 genotype probabilities and inferred genetic distances from the probability matrices for phylogenetic  
217 reconstruction. This allowed us to reconstruct phylogenies of symbionts from more *O. algarvensis*  
218 individuals, up to twice as many individuals than using the deterministic approach (between 3% and 131%  
219 increase; Supplementary Table S4a). Moreover, the probabilistic approach increased the robustness of our  
220 phylogenetic analyses, as it led to a substantial increase in SNP-sites (ranging from 0.035 to 0.752  
221 SNP/kbp; Supplementary Table S4b; see Supplementary text 1.4). Our comparison of phylogenies based on  
222 deterministic and probabilistic SNP-identification showed consistent phylogenetic clustering for the  
223 samples that could be analysed using both methods (Figure 3; Supplementary Figure S5; Supplementary  
224 text 1.4). Therefore, we based our analyses on the probabilistic approach that allowed us to (i) include  
225 significantly more samples and (ii) identify more SNP-sites to infer more robust phylogenies  
226 (Supplementary Table S4).

227

228 **Congruence of symbiont and mitochondrial phylogenies varied from high to absent**

229 To examine partner fidelity in the *O. algarvensis* symbiosis, we compared the phylogenies of the six most  
230 widespread symbionts with that of their hosts' mitochondrial genomes. The degree of congruence between  
231 symbiont and host phylogenies reflects the degree of fidelity between partners, with high congruence  
232 indicating strong fidelity and vice-versa<sup>12,13,21</sup>. For the host population, their mtDNA phylogeny revealed a  
233 clear divergence between two mitochondrial lineages (termed A- and B-hosts), corresponding to the two  
234 COI-haplotypes A and B (Figure 3a). In contrast, the two locations appeared to play a smaller role in  
235 shaping mitochondrial phylogeny, with only B-hosts from Sant' Andrea forming a well-supported clade.

236 However, the phylogenetic relationships within the mitochondrial lineages could not be fully resolved due  
237 to their limited genetic divergence (Supplementary Figure S6).

238 For the six symbionts of *O. algarvensis*, we found marked differences in the congruence of their  
239 phylogenies with that of their hosts' mitochondrial genomes (Figure 3b-g). Congruence was highest in *Ca.*  
240 Thiosymbion, which mirrored the mitochondrial phylogeny of their hosts, with symbionts from A- and B-  
241 hosts falling into two separate clades (Figure 3b). Phylogenetic relationships within each *Ca.* Thiosymbion  
242 clade could not, however, be resolved due to their limited genetic divergence (Supplementary Figure S6b).  
243 The Gamma3 symbionts formed nine groups, most of which were statistically supported clades, with each  
244 group containing symbionts from either A- or B hosts (Figure 3c). The exception was a Gamma3 symbiont  
245 of a B-host from Cavoli that fell in a clade of A-host symbionts from Cavoli (magnified panel in Figure  
246 3c). Location also appeared to affect the phylogeny of Gamma3 symbionts, with symbionts from the same  
247 bay forming distinct groups.

248 For all other symbionts besides the *Ca.* Thiosymbion and Gamma3, there was no phylogenetic  
249 divergence between symbionts from A- and B-hosts (Figure 3d-g). Location affected the phylogeny of the  
250 Delta4 symbionts, with two well supported clades separating symbionts from Cavoli and Sant' Andrea  
251 (Figure 3f). The Delta1b symbionts also clustered based on their location, but the clades were not  
252 statistically supported (Figure 3e). For the Delta1a and spirochete, neither host mitochondrial lineage nor  
253 location affected their phylogenetic clustering (Figure 3d-e, 3g).

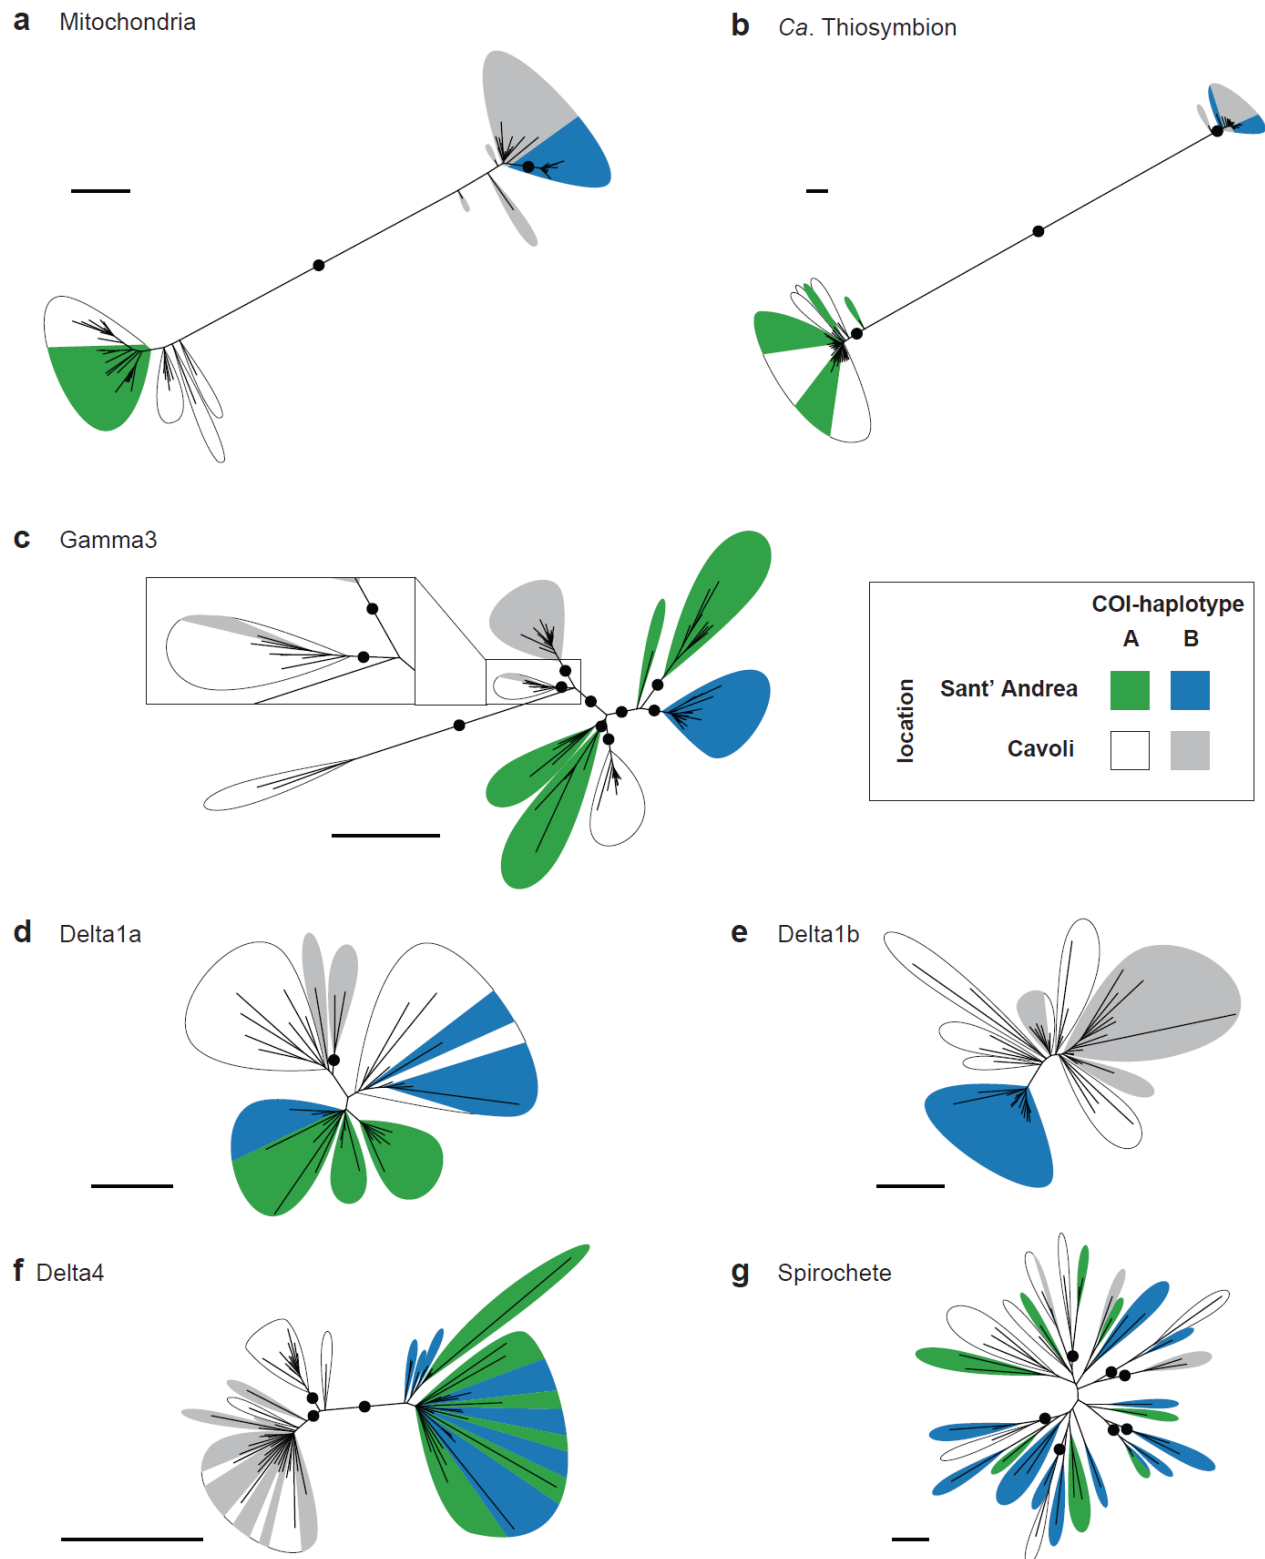

254

255 **Figure 3. Comparative phylogenetic analyses of *O. algarvensis* and its microbial consortium members revealed variable**  
 256 **patterns of congruence across the six symbionts.** Phylogenetic trees based on SNPs across genomes of (a) host mitochondria  
 257 (166 SNPs, n = 80), (b) Ca. Thiosymbion (2872 SNPs, n = 80), (c) Gamma3 symbiont (618 SNPs, n = 80), (d) Delta1a symbiont (375  
 258 SNPs, n = 37), (e) Delta1b symbiont (624 SNPs, n = 46), (f) Delta4 symbiont (675 SNPs, n = 67), and (g) spirochete symbiont (88  
 259 SNPs, n = 41). Phylogenies were inferred from genetic distances calculated from posterior genotype probabilities. Scale bars indicate  
 260 0.1 substitution per SNP-site. Bootstrap support values >95% are shown in black circles. Supports for branches internal to each  
 261 coloured leaf were omitted for visibility.  
 262

263 We further examined congruence between the phylogenies of *O. algarvensis* mitochondria and its  
264 symbionts using two additional approaches. First, we compared the pairwise genetic distances of hosts and  
265 symbionts using three categories: within A- or B-hosts from the same location (within), between A- and B-  
266 hosts (mito), and between the two locations Sant' Andrea and Cavoli (location). We tested if genetic  
267 distances were explained by host mitochondrial lineage or by location, by analysing pairwise genetic  
268 distances in 'within' vs. 'mito', and 'within' vs. 'location' (Figure 4, Table 1, Supplementary Table S5).  
269 For the host, both the mitochondrial lineage and the location had a significant effect on genetic distances,  
270 as observed in our phylogenetic SNP analyses. For the symbionts, there was a significant effect of the  
271 mitochondrial lineage on genetic distances in *Ca. Thiosymbion* and Gamma3 symbionts, while the effect of  
272 location was well supported for the Gamma3 and Delta4 symbionts, again confirming our phylogenetic  
273 analyses. An effect of location on genetic distances was also significant for the Delta1b symbionts, but only  
274 for B-host symbionts, as they were not detected in A-hosts from Sant' Andrea.

275 We next examined whether the genetic distance of mtDNA between pairs of *O. algarvensis*  
276 individuals corresponded to that of their symbionts. To test for this genetic co-divergence, correlations of  
277 the pairwise genetic distances were calculated between mtDNA and each of the six symbionts  
278 (Supplementary Figure S7, Supplementary Table S6a). The genetic distance of *Ca. Thiosymbion* symbiont  
279 had the strongest positive correlation with mtDNA genetic distances (Table 1, Supplementary Figure S7a,  
280 Supplementary Table S6a). For the Gamma3, Delta1a, Delta1b, and Delta4 symbionts, we only observed  
281 weak positive correlations (Supplementary Figure S7b-e). Genetic co-divergence between the spirochete  
282 symbiont and host mitochondria was not detectable (Supplementary Figure S7f, Supplementary Table S6a).  
283 Correlation coefficients (Mantel's R) calculated above for the six symbionts showed a positive correlation  
284 with the symbionts' relative read abundances (Figure 2b; Supplementary Table S6b). In other words, the  
285 higher the relative abundance of a symbiont species in the host individuals, the greater the degree of genetic  
286 co-divergence between the symbiont species and *O. algarvensis*.

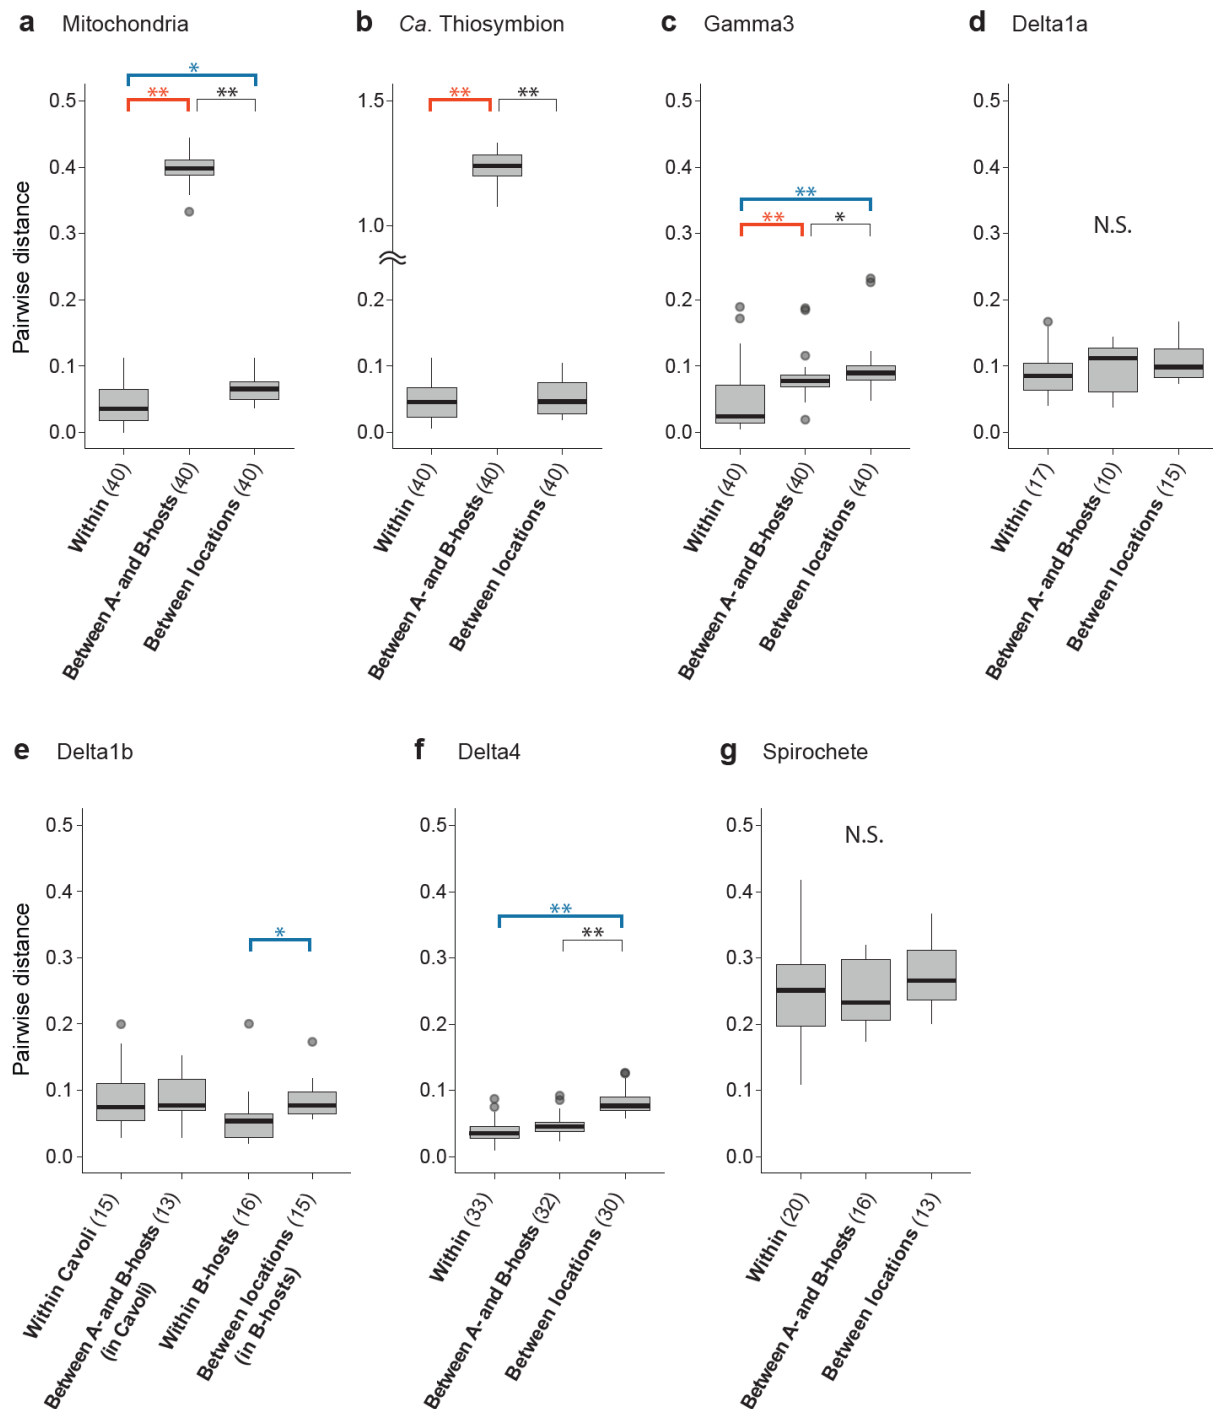

287

288

289

290

291

292

293

294

295

296

297

298

299

300

301

**Figure 4. Host mitochondrial lineage and geographic location had a significant effect on the genetic divergence of some but not all symbionts.** Host mitochondrial lineages explained genetic divergence in *Ca. Thiosymbion* and *Gamma3*, while geographic location explained divergence in the *Gamma3*, *Delta1b* and *Delta4* symbionts. Pairwise genetic distances in *O. algarvensis* mitochondrial genomes and symbionts were calculated from pairs of *O. algarvensis* individuals within the same combination of host lineage (A- or B-host) and location (**Within**), between individuals of A- and B hosts from the same location (**Between A- and B-hosts**), and between individuals from the two locations Sant' Andrea and Cavoli, but from the same host lineage (**Between locations**). Pairwise genetic distances were compared among these three categories for (a) mitochondria, (b) *Ca. Thiosymbion*, (c) *Gamma3* symbiont, (d) *Delta1a* symbiont, (e) *Delta1b* symbiont, (f) *Delta4* symbiont, and (g) spirochete symbiont. Genetic distances were normalized per SNP site and log-scaled. Thick horizontal lines and grey boxes respectively indicate the median and interquartile range (IQR) of observations. Vertical lines show the IQR  $\pm 1.5$  IQR range, and outliers out of this range are shown as circles. Numbers in brackets indicate numbers of pairwise comparisons per category tested. Asterisks respectively denote statistical significance (\*;  $p < 0.05$ , \*\*;  $p < 0.01$ . see Supplementary Table S5). Orange and blue brackets highlight a significant effect on genetic divergence by the mitochondrial lineage and location, respectively. N.S. indicates no significant differences among categories ( $p > 0.05$ ).

302 **Table 1:** Levels of partner fidelity between *O. algarvensis* and its symbiotic consortia based on analyses in  
 303 this study.

| Symbiont               | Observations                           |                       |                                                          |                                 | Indication                                                                                                         |                 |
|------------------------|----------------------------------------|-----------------------|----------------------------------------------------------|---------------------------------|--------------------------------------------------------------------------------------------------------------------|-----------------|
|                        | Significant effect on genetic distance |                       | Mitochondria-symbiont co-divergence pattern <sup>3</sup> | Relative abundance <sup>4</sup> | Other                                                                                                              | Fidelity        |
| <b>Ca. Thiosymbion</b> | Mitochondria <sup>1</sup>              |                       | Strong                                                   | 41.6%                           | Detected in all host individuals. High genomic divergence between host maternal lineages A and B at both locations | <b>Strict</b>   |
| <b>Gamma3</b>          | Mitochondria <sup>1</sup>              | Location <sup>2</sup> | Present                                                  | 28.3%                           | Detected in all host individuals. A single switch from an A- to a B-host observed                                  | <b>Strong</b>   |
| <b>Delta1a</b>         |                                        |                       | Weak                                                     | 5.3%                            | Detected in all A-hosts from both locations, but in <50% of B-hosts from both locations                            | <b>Moderate</b> |
| <b>Delta1b</b>         |                                        | Location <sup>2</sup> | Present                                                  | 6.1%                            | Not detected in A-hosts from Sant' Andrea, but detected in 65 – 100% of other host individuals                     | <b>Moderate</b> |
| <b>Delta3</b>          | N.A.                                   | N.A.                  | N.A.                                                     | 0.3%                            | Detected in only 0 – 15% of host individuals                                                                       | N.A.            |
| <b>Delta4</b>          |                                        | Location <sup>2</sup> | Weak                                                     | 14.9%                           | Detected in 85 – 100% of host individuals                                                                          | <b>Weak</b>     |
| <b>Spirochete</b>      |                                        |                       | Absent                                                   | 3.4%                            | Detected in all host individuals                                                                                   | <b>Absent</b>   |

304 <sup>1</sup>; Pairwise genetic distances of symbionts were explained by their host mitochondrial lineage A or B (A- or B-hosts).

305 <sup>2</sup>; Pairwise genetic distances of symbionts were explained by locations.

306 <sup>3</sup>; Refer Supplementary Figure S7 and Supplementary Table S6.

307 <sup>4</sup>; Mean relative read abundances across all host individuals.

308 N.A.; Not assessed due to the very low abundance of this symbiont in only six host individuals.

309

## 310 Discussion

311 Our analyses revealed that fidelity between the gutless annelid *O. algarvensis* and its endosymbiotic  
 312 microbial consortium varied from strict to absent. This variability in partner fidelity likely occurred over a  
 313 short, microevolutionary period, as we analysed a population of *O. algarvensis* from two very closely  
 314 related mitochondrial lineages (0.7% divergence) that co-occurred in two bays separated by only 16 km. To  
 315 our knowledge, all previous studies on the stability of symbioses in hosts that are obligately associated with  
 316 multiple symbionts have focussed on congruence of host and symbiont phylogenies over  
 317 macroevolutionary timescales (e.g. <sup>14,62-64</sup>). Our study highlights the importance of examining fidelity over

318 microevolutionary timescales, as it was central to revealing the broad range of fidelity across the members  
319 of the *O. algarvensis* symbiont community from strict over intermediate to absent. Over macroevolutionary  
320 timescales, strict fidelity is disrupted in *Ca*. Thiosymbion (see below), and it is unlikely that we would have  
321 detected the strong to moderate levels of fidelity in other members of the *O. algarvensis* symbiont  
322 community over longer evolutionary time.

323

### 324 **Varying degrees of partner fidelity indicate a spectrum of mixed-modes between vertical and** 325 **horizontal transmission**

326 Different degrees of partner fidelity across the microbial consortium of *O. algarvensis* reflect the  
327 faithfulness with which the symbionts are transmitted from one generation to the next. The symbionts of  
328 marine gutless annelids are transmitted vertically through egg-smearing, during which the egg passes  
329 through symbiont-rich tissues termed genital pads<sup>46-48</sup>. The egg is then encased in a cocoon and deposited  
330 in the sediment. This process offers opportunities for horizontal transmission of bacteria from the  
331 surrounding sediment or co-occurring hosts. Indeed, previous studies have shown that over  
332 macroevolutionary time, host switching and displacement disrupt fidelity in *Ca*. Thiosymbion<sup>49,50</sup>. Our  
333 analyses of *O. algarvensis* suggest that on microevolutionary scales, transmission is strictly vertical for *Ca*.  
334 Thiosymbion, given the strong phylogenetic congruence and genetic co-divergence between these  
335 symbionts and their hosts' mitochondria, independent of their collection site (Supplementary text 1.6). We  
336 also observed strong fidelity in the Gamma3 symbiont, with only a single switching event from an A- to a  
337 B-host in Cavoli (Figure 3c). In contrast, partner fidelity is intermediate to absent for the  
338 deltaproteobacterial and spirochete symbionts. It is therefore likely that these symbionts are regularly  
339 acquired horizontally from a free-living population or other co-occurring host individuals (Supplementary  
340 text 1.6). For the Gamma3, Delta1b and Delta4 symbionts, we also observed effect of their geographic  
341 location on their genetic distances (Figure 4, Table 1). Explanations for this effect include differences in the  
342 geographic distribution of genotypes for these symbionts in the environment as well as isolation-by-  
343 distance effects on partner choice, but cannot be resolved without additional in-depth analyses of the free-  
344 living symbiont population.

345



346 **How can we explain such different degrees of partner fidelity in the *O. algarvensis* symbiosis?**

347 Strong partner fidelity is widespread in associations in which the symbionts are critical for the host's  
348 survival and fitness<sup>2,65</sup>. In *O. algarvensis*, the relative abundance of symbionts was positively correlated  
349 with fidelity, with the highest fidelity detected for their sulphur-oxidizing symbionts *Ca. Thiosymbion* and  
350 Gamma3. These symbionts are the primary producers for their gutless hosts by autotrophically fixing CO<sub>2</sub>  
351 into organic compounds<sup>36,38,45</sup>. All *O. algarvensis* individuals from both bays harboured these symbionts,  
352 and they consistently dominated the microbial consortia at 46 – 86%. Given that *O. algarvensis* gains all of  
353 its nutrition by digesting its endosymbionts via endocytosis<sup>54,55</sup>, those symbionts that provide most of its  
354 nutrition are likely most strongly selected for, as they most directly affect the fitness of their host.

355 In contrast, selective pressures on maintaining the symbiotic association are likely relaxed for  
356 symbionts that are less critical for their host's fitness or are functionally redundant. The  
357 deltaproteobacterial, sulphate-reducing symbionts play an important role by producing reduced sulphur  
358 compounds as energy sources for the sulphur-oxidizing bacteria, particularly when these compounds are  
359 limiting in the sediment environment<sup>36</sup>. However, all four deltaproteobacterial symbionts reduce sulphate to  
360 sulphide<sup>36-38,51,52</sup>, making this trait functionally redundant among these symbionts. Correspondingly, the  
361 presence and abundance of the four sulphate-reducing symbionts varied across host individuals, with  
362 different combinations of one to three of these symbionts in each host. This pick and mix pattern indicates  
363 that *O. algarvensis* fitness is not dependent on any particular deltaproteobacterial symbiont species. The  
364 lower relative abundance of reads from deltaproteobacterial symbionts (summed average 27%) compared  
365 to those of the sulphur oxidizers (70%), as well as their limited biomass<sup>28,29</sup>, further indicates that the  
366 deltaproteobacterial symbionts are not as essential for their host's nutrition as *Ca. Thiosymbion* and  
367 Gamma3.

368 The absence of fidelity in the spirochete symbionts was unexpected, given their regular presence in  
369 *O. algarvensis* individuals and in other gutless annelids from around the world<sup>40,66</sup> (Supplementary Figure  
370 S2). While the metabolism of this symbiont is not yet known, it was by far the least abundant symbiont in  
371 *O. algarvensis* in this study (3% relative read abundance) as well as previous ones<sup>37-39,53,54</sup>, indicating a  
372 limited role of these symbionts in their hosts' nutrition.

373

374 **Having your cake and eating it too: The advantage of flexibility in partner fidelity**

375 The lack of stringent partner fidelity between *O. algarvensis* and its deltaproteobacterial and spirochete  
376 symbionts indicates that these hosts regularly acquire novel intraspecific genotypes from the environment  
377 or from co-occurring host individuals. These newly acquired intraspecific genotypes, together with the  
378 interspecific variability in the deltaproteobacterial community across host individuals, could expand the  
379 ecological niche of *O. algarvensis*, and enable the population to adapt to fluctuating environments. For  
380 example, new symbiont genotypes could be better adapted to the environment, provide greater flexibility in  
381 the use of resources from the environment, and enable resilience to seasonal and long-term temperature  
382 changes<sup>5,67-69</sup>. On the other hand, weak partner fidelity can be costly for the host, including the failure to  
383 find suitable symbionts, acquisition of harmful bacteria, or association with ‘cheaters’ that do not provide  
384 mutualistic benefits<sup>70</sup>. However, these costs are likely to be minimal for the deltaproteobacterial symbionts,  
385 as their partner quality depends largely on their ability to produce reduced sulphur compounds, a trait that  
386 is characteristic for all sulphate-reducing bacteria, and for which cheating is not possible.

387 For *O. algarvensis*, fluctuating environmental conditions may be more critical selective forces than  
388 the costs of weak partner fidelity. *O. algarvensis*, like other marine annelids, does not have a pelagic life  
389 stage and can likely not disperse as widely as many other infaunal invertebrates<sup>47</sup>. These hosts therefore  
390 face the risk of local extinction if environmental conditions become unsuitable for their symbionts. Free-  
391 living bacteria rapidly adapt to new environmental conditions<sup>71</sup>, and horizontal acquisition of symbionts  
392 from the environment can increase the host’s potential to adapt to environmental challenges rapidly<sup>72</sup>. The  
393 benefit of long-term survival via an evolutionary bet-hedging<sup>73,74</sup> may therefore outweigh the cost of  
394 recruiting less-favourable symbionts<sup>56</sup>.

395

396 **Probabilistic approaches to SNP-identification expand ecological and evolutionary studies of**  
397 **microbial communities**

398 Metagenomic analyses of intraspecific genetic variability in microbial communities typically rely on deep  
399 sequencing of each genotype to obtain sufficient SNPs across their genomes<sup>75</sup>, incurring substantial  
400 sequencing costs. In this study, we reconstructed phylogenies of symbionts directly from genotype  
401 probabilities across their genomes, rather than calling genotypes. This probabilistic approach accurately

402 identifies SNPs from low-coverage sequencing data by accounting for the uncertainties of genotyping<sup>57</sup>.  
403 This approach has several advantages, including the lower costs of low-coverage sequencing, the ability to  
404 analyse the genetic diversity of low-abundance species, and an increased robustness of phylogenetic  
405 analyses through the recovery of higher SNP numbers. Our study highlights how approaches using  
406 genotype probabilities can be applied to the population genetics of host-associated microbiota with variable  
407 abundances. Furthermore, our results indicate that probabilistic approaches can also be used to study  
408 evolutionary dynamics in free-living microbial communities, thus greatly expanding our toolbox for  
409 understanding non-cultivable microorganisms.

410

## 411 **Conclusions**

412 We showed that partner fidelity varies from strict to absent in the association between the gutless marine  
413 annelid *O. algarvensis* and its microbial consortium. This variability in fidelity was unexpected given that  
414 these hosts transmit their symbionts vertically via egg-smearing. Our results highlight the importance of  
415 examining partner fidelity at microevolutionary scales, as over longer evolutionary time, strict vertical  
416 transmission is rare in most symbioses<sup>69,76</sup>. Understanding the processes that drive fidelity within  
417 associations over short to long evolutionary time will help identify the benefits and costs in maintaining  
418 symbiotic associations. Such efforts should ideally encompass increasing geographic and taxonomic scales,  
419 beginning with local host populations and expanding to regional intraspecific analyses to large-scale global  
420 analyses across host species, e.g.<sup>77-80</sup>. Rapid advances in high-throughput sequencing combined with  
421 substantial reductions in sequencing costs using probabilistic SNP-calling now make such studies feasible,  
422 and will contribute to revealing the driving forces that shape the complex and fluid nature of multi-member  
423 symbioses<sup>68,81-83</sup>.

424

## 425 **Methods**

### 426 **Specimen collection and host mitochondrial lineage screening**

427 A total of 579 *O. algarvensis* individuals from two locations on Elba, Italy (Sant' Andrea; 42°48'31"N /  
428 10°08'33"E, and Cavoli, 42°44'05"N / 10°11'12"E; Figure 1c and 1d; n = 346 and 233, respectively) were  
429 screened for their mitochondrial lineages based on their mitochondrial COI gene sequences (COI-

430 haplotypes). *O. algarvensis* individuals were collected between 2010 and 2016 from sandy sediments in the  
431 vicinity of *Posidonia oceanica* seagrass beds at water depths between 7 and 14 m, as previously  
432 described<sup>38</sup>. Live specimens were (i) flash-frozen in liquid nitrogen and stored at -80° C, or (ii) immersed in  
433 RNAlater (Thermo Fisher Scientific, Waltham, MA, USA) and stored at 4° C. DNA was individually  
434 extracted from single worms using the DNeasy Blood & Tissue Kit (Qiagen, Hilden) according to the  
435 manufacturer's instructions. 670 bp of the COI gene was amplified with PCR using the primer set of COI-  
436 1490F (5'-GGT-CAA-CAA-ATC-ATA-AAG-ATA-TTG-G-3') and COI-2189R (5'-TAA-ACT-TCA-  
437 GGG-TGA-CCA-AAA-AAT-CA-3') as previously described<sup>84</sup>. PCR-amplicons were sequenced using the  
438 BigDye Sanger sequencing kit (Life Technologies, Darmstadt, Germany) with the COI-2189R primer on  
439 the Applied Biosystems Hitachi capillary sequencer (Applied Biosystems, Waltham, USA) according to the  
440 manufacturer's instructions. COI sequences were quality-filtered with a maximum error rate of 0.5% and  
441 aligned using MAFFT v7.45<sup>85</sup> in Geneious software v11.0.3 (Biomatters, Auckland, New Zealand). A COI-  
442 haplotype network was built on a 525 bp core alignment using the TCS statistical parsimony algorithm<sup>86</sup>  
443 implemented in PopART v1.7<sup>87</sup>. Twenty *O. algarvensis* individuals from each 'host group' (i.e. the  
444 combination of sample location, Sant' Andrea or Cavoli, and COI-haplotype A or B; 4 groups in total)  
445 were randomly selected for metagenomic sequencing (n=80 individuals total).

446

#### 447 **Metagenome sequencing**

448 Sequencing libraries were constructed from the DNA extracted from single worms using a Tn5 transposase  
449 purification and tagmentation protocol<sup>88</sup>. The Tn5 transposase was provided by the Protein Science Facility  
450 at Karolinska Institutet Sci Life Lab (Solna, Sweden). Quantity and quality of DNA samples were checked  
451 with the Quantus Fluorometer with the QuantiFluor dsDNA System (Promega Corporation, Madison, WI,  
452 USA), the Agilent TapeStation System with the DNA ScreenTape (Agilent Technologies, Santa Clara, CA,  
453 USA), and the FEMTO Pulse genomic DNA analysis kit (Advanced Analytical Technologies Inc.,  
454 Heidelberg, Germany) prior to library construction. Insert template DNA was size-selected for 400 – 500  
455 bp using the AMPure XP (Beckman Coulter, Indianapolis, IN, USA). Paired-end 150 bp sequences were  
456 generated using the Illumina HiSeq3000 System (Illumina, San Diego, CA, USA) with an average total

457 yield of 2.5 Gbp per sample ( $2,548 \pm 715$  Mbp (mean  $\pm$  SD)). Construction and quality control of libraries  
458 and sequencing were performed at the Max Planck Genome Centre (Cologne, Germany).

459

#### 460 **Assembly of reference genomes of endosymbionts and *O. algarvensis* mitochondrion**

461 Metagenome-assembled genomes (MAGs) of the *Ca.* Thiosymbion, Gamma3, Delta4 and spirochete  
462 symbionts were *de-novo* assembled from a deeply-sequenced metagenome of an *O. algarvensis* individual  
463 available at the European Nucleotide Archive (ENA) project PRJEB28157 (Specimen ID: OalgB6SA;  
464 approx. 7 Gbp; Supplementary Table S1). In addition, MAGs of Delta1a, Delta1b and Delta3 were  
465 obtained from the public database deposited under the ENA project accession number PRJEB28157<sup>51,52</sup>.  
466 For the *de-novo* assembly, raw metagenomic reads were first adapter-trimmed and quality-filtered with  
467 length  $\geq 36$  bp and Phred quality score  $\geq 2$  using *bbduk* of BBTools v36.86 ([http://jgi.doe.gov/data-and-](http://jgi.doe.gov/data-and-tools/bbtools)  
468 [tools/bbtools](http://jgi.doe.gov/data-and-tools/bbtools)), and corrected for sequencing errors using BayesHammer<sup>89</sup> implemented in SPAdes v3.9.1<sup>90</sup>.  
469 Clean reads were assembled using MEGAHIT v1.0.6<sup>91</sup>, and symbiont genome bins were identified with  
470 MetaBAT v0.26.3<sup>92</sup>. Bins were assigned to the *Ca.* Thiosymbion, Gamma3, Delta4 and spirochete  
471 symbionts based on 99 – 100% sequence matches with their reference 16S rRNA gene sequences (NCBI  
472 accession numbers AF328856, AJ620496, AJ620497, AJ620502<sup>36,39</sup>, respectively). MAGs were further  
473 refined using Bandage v0.08.1<sup>93</sup> by identifying and inspecting connected contigs on assembly graphs.  
474 Completeness and contamination of the MAGs were estimated with CheckM version 1.0.7<sup>94</sup>, and assembly  
475 statistics of symbiont genomes were calculated with QUAST v5.0.2<sup>95</sup> (Supplementary Table S1).

476 Complete mitochondrial genomes (mtDNA) were assembled from two metagenomes of *O.*  
477 *algarvensis* from Sant' Andrea representing the two COI-haplotypes A and B (Specimen IDs:  
478 “OalgSANT\_A04” and “OalgSANT\_B04”, respectively). Duplicated sequences due to PCR-amplification  
479 during the library preparation were first removed from raw sequences using FastUniq v1.1<sup>96</sup> prior to  
480 adapter-clipping and quality-trimming with Phred quality score  $\geq 2$  using Trimmomatic v0.36<sup>97</sup>. A  
481 preliminary mtDNA scaffold was first generated by iterative mapping of the clean reads to a reference COI  
482 sequence of *O. algarvensis* (NCBI accession number KP943854; as a bait sequence) with MITObim v1.9<sup>98</sup>.  
483 Mitochondrial reads were then identified by mapping to the mtDNA scaffold using *bbmap* in BBTools, and  
484 mtDNA was assembled from the identified reads with SPAdes. A circular mtDNA was identified on

485 assembly graphs in Bandage, and annotated using MITOS2 webserver (<http://mitos2.bioinf.uni-leipzig.de>)  
486 to confirm the completeness<sup>99</sup>.

487

#### 488 **Characterization of symbiont community composition**

489 The taxonomic composition of the *O. algarvensis* metagenomes was first screened by identifying 16S  
490 rRNA gene sequences using phyloFlash v3.3-beta1<sup>100</sup> using the SILVA SSU database release 132<sup>101</sup> as  
491 reference. The 16S rRNA gene sequences of *O. algarvensis* symbionts were assembled with SPAdes  
492 implemented in phyloFlash, and aligned using MAFFT in Geneious to identify SNP sites. Chimeric and  
493 incomplete (<1,100 bp) SSU sequences were identified in the alignment and excluded.

494 Relative abundances of *O. algarvensis* symbionts were estimated by mapping metagenome reads to a  
495 collection of symbiont-specific sequences of single-copy genes extracted from the genome bins.

496 Orthologous single-copy gene sequences were first identified within each of the reference symbiont MAGs  
497 with CheckM. To ensure unambiguous taxon-differentiation, duplicated genes detected in each symbiont  
498 MAG (i.e. those labelled as ‘contamination’ in CheckM) as well as sequences sharing >90% nucleotide  
499 identity between multiple symbiont species (checked with CD-HIT v4.5.4<sup>102</sup>; 8 cases identified between the  
500 Delta1a and Delta1b symbionts) were removed from the final reference sequences of single-copy genes.

501 Metagenomic reads (quality-filtered with the same processes as for the mtDNA assembly above) matching  
502 to the single-copy gene sequences were quantified using Kallisto v0.44.0<sup>103</sup> (Supplementary text 1.1).

503 Symbiont composition estimates were plotted in R using ggplot2 package v3.2.1<sup>104</sup>.

504 To examine whether our phylogenetic analysis of each *O. algarvensis* symbiont reflects a single  
505 dominant genotype per host individual, levels of symbiont genotype diversity within a host individual were  
506 assessed by calculating SNP-densities (the number of SNP sites per Kbp of reference genome) with  
507 previously established procedures<sup>60</sup>. This analysis was performed using a set of publicly available deeply-  
508 sequenced metagenomes of *O. algarvensis* (listed in Supplementary Table S2a) to ensure that SNP-  
509 densities were estimated using sufficient symbiont read-coverages and that these estimates could be  
510 compared to those in other studies performing similar assessments<sup>21,59,60</sup>.

511

#### 512 **Identification of single nucleotide polymorphisms and phylogenetic reconstruction**

513 For identification of SNPs in the genomes of symbionts and mitochondria, quality-controlled reads were  
514 first unambiguously split into different symbiont species using *bbsplit* of BBTools, using the reference  
515 symbiont MAGs described above. Mitochondrial reads were identified with the reference mtDNA sequence  
516 derived from the specimen “OalgSANT\_A04” (Sant’ Andrea, COI-haplotype A) using *bbmap* with a  
517 minimum nucleotide identity of 95%; This step was performed to remove potential contaminations from  
518 sequences of nuclear mitochondrial pseudogenes divergent from the mtDNA<sup>105</sup>, while ensuring successful  
519 mapping of mtDNA reads in the analysis for both A- and B-hosts given the high nucleotide identity of  
520 mtDNAs between these two lineages (>99%; see results).

521 To reconstruct phylogenies of symbionts and mitochondria, SNPs in genomes of symbionts and host  
522 mitochondria were identified using two approaches; based on (i) posterior genotype probabilities without  
523 genotype calling, and (ii) deterministic genotyping only at genetic positions that were deeply sequenced in  
524 all samples. For the SNP-identification without genotyping (i), the symbiont- and mitochondrial-reads  
525 identified above were mapped onto individual reference genomes of symbionts and mitochondria using  
526 *bbmap*. Mapping files were filtered based on mapping quality using samtools v1.3.1<sup>106</sup> and BamUtil  
527 v1.0.14<sup>107</sup>, deduplicated with *MarkDuplicates* of Picard Toolkit v2.9.2  
528 (<https://github.com/broadinstitute/picard>), and realigned around indels with Genome Analysis Tool Kit  
529 v3.7<sup>108</sup>. Posterior genotype probabilities were calculated with ANGSD v0.929<sup>109</sup>. ANGSD is widely used  
530 for studies of diploid organisms to infer genotypes from low-coverage sequencing data while taking  
531 sequencing errors into account<sup>109-111</sup>. To deal with haploid genotypes in ANGSD, all genotypes were  
532 assumed to be ‘homozygous’ by setting an inbreeding coefficient F of ‘1’ and a uniform prior were  
533 specified for posterior probability calculation (T.S. Korneliussen, 2018, pers. comm.). SNP sites were  
534 identified as reference nucleotide positions that were covered  $\geq 1\times$  by all samples and showed statistically  
535 significant support (SNP p-value < 0.01). When no SNP site was found due to very low or lacking reads  
536 from a symbiont, these samples were excluded based on a cut-off of lateral coverages (i.e. % reference  
537 genetic sites covered by reads; Supplementary Table S4). For symbionts and mitochondria, their pairwise  
538 genetic distances in host individuals were obtained from the matrix of genotype probabilities using  
539 NGSdist v1.0.2<sup>58</sup>. Phylogenetic trees with bootstrap-support were computed from the resulting distant  
540 matrix using FastME v2.1.5.1<sup>112</sup> and RAxML v8.2.11<sup>113</sup>.



541 For the SNP-identification by deterministic genotyping (**ii**), the same symbiont- and mitochondrial-  
542 reads were analysed with the SNIPPY pipeline v3.2 (<https://github.com/tseemann/snippy>), with the same  
543 reference genomes of mtDNA and symbionts as above (Supplementary text 1.4).

544

#### 545 **Analyses of phylogenetic patterns of symbionts based on host mitochondrial lineages and locations**

546 To examine which factors drive the patterns of genetic divergence in mitochondria and symbionts, their  
547 pairwise genetic distances were statistically compared in 3 categories of host pairs; (**a**) within the same  
548 combination of location plus A- or B-hosts, (**b**) between A- and B-hosts (A vs. B in Cavoli, and A vs. B in  
549 Sant' Andrea), and (**c**) between locations (Cavoli vs. Sant' Andrea in A-hosts, and Cavoli vs. Sant' Andrea  
550 in B-hosts). Sample pairs in each category were randomly selected without replacement to ensure data  
551 independence. For the Delta1b symbionts, we separately compared (**a**) vs. (**b**) within Cavoli, and (**a**) vs. (**c**)  
552 within B-hosts, because Delta1b did not occur in A-hosts in Sant' Andrea. The statistical analyses were  
553 performed for each of the symbionts and mitochondria using Kruskal-Wallis rank sum test and Dunn post-  
554 hoc tests with p-value adjustment by controlling the false-discovery rate, using R core package v3.4.2<sup>114</sup>  
555 and FSA package v0.8.25<sup>115</sup>. To examine genetic co-divergence patterns between a symbiont and host  
556 mtDNA, regressions of pairwise genetic distances estimated with NGSdist were examined using Mantel  
557 tests implemented in the R-package *vegan* v2.4.4<sup>116</sup>. A correlation between Mantel's Rs and relative  
558 abundances of symbionts based on reads mapped to single-copy genes was tested with Kendall's rank  
559 correlation tau using the function *test.cor* in R's core package.

560

#### 561 **Data and script availability**

562 Raw metagenome sequences, and reference genomes of mitochondria and symbionts generated in this  
563 study were deposited in the European Nucleotide Archive (ENA) under accession number PRJEB42310.  
564 Annotated bioinformatic scripts with all specific parameters, as well as reference single-copy gene  
565 sequences, are available in a GitHub depository ([https://github.com/yuisato/Oalg\\_linkage](https://github.com/yuisato/Oalg_linkage)).

566

#### 567 **Acknowledgements**

568 This work was supported by the Max Planck Society, a Gordon and Betty Moore Foundation Marine  
569 Microbial Initiative Investigator Award to ND (Grant GBMF3811), a U.S. National Science Foundation  
570 award to MK (grant IOS 2003107), the USDA National Institute of Food and Agriculture Hatch project  
571 1014212 (MK), and the European Union's Horizon 2020 research and innovation program under the Marie  
572 Skłodowska-Curie grant agreement No 660280 (CW). The authors thank the Hydra Institute for logistical  
573 support during sample collection, and Toby Kiers and members of the Department of Symbiosis for  
574 valuable discussions.

575

## 576 **Author Contributions**

577 ND, MK, CW and JW conceived the study and MK, ND, YS, JW and HGV designed the work. YS, JW,  
578 CW, MS and MK acquired materials and data, YS, JW and RA analysed data. YS, JW, RA, ND and MK  
579 interpreted results. YS wrote the manuscript with support from ND and MK, and revisions from all other  
580 co-authors.

581

## 582 **Competing Interests**

583 The authors declare no competing interest.

584

## 585 **References**

- 586 1 Fisher, R. M., Henry, L. M., Cornwallis, C. K., Kiers, E. T. & West, S. A. The evolution of host-symbiont  
587 dependence. *Nature Communications* **8**, 15973, doi:10.1038/ncomms15973 (2017).
- 588 2 Sachs, J. L., Skophammer, R. G. & Regus, J. U. Evolutionary transitions in bacterial symbiosis. *Proceedings of*  
589 *the National Academy of Sciences* **108**, 10800-10807, doi:10.1073/pnas.1100304108 (2011).
- 590 3 Dubilier, N., Bergin, C. & Lott, C. Symbiotic diversity in marine animals: the art of harnessing  
591 chemosynthesis. *Nature Reviews Microbiology* **6**, 725-740, doi:10.1038/nrmicro1992 (2008).
- 592 4 Douglas, A. E. & Werren, J. H. Holes in the Hologenome: Why Host-Microbe Symbioses Are Not Holobionts.  
593 *mBio* **7**, e02099-02015, doi:10.1128/mBio.02099-15 (2016).
- 594 5 Ebert, D. The epidemiology and evolution of symbionts with mixed-mode transmission. *Annual Review of*  
595 *Ecology, Evolution, and Systematics* **44**, 623-643, doi:10.1146/annurev-ecolsys-032513-100555 (2013).
- 596 6 Bright, M. & Bulgheresi, S. A complex journey: transmission of microbial symbionts. *Nature Reviews*  
597 *Microbiology* **8**, 218-230, doi:10.1038/nrmicro2262 (2010).
- 598 7 Moran, N. A. & Dunbar, H. E. Sexual acquisition of beneficial symbionts in aphids. *Proceedings of the*  
599 *National Academy of Sciences* **103**, 12803-12806, doi:10.1073/pnas.0605772103 (2006).
- 600 8 Bull, J. J. & Rice, W. R. Distinguishing mechanisms for the evolution of co-operation. *Journal of Theoretical*  
601 *Biology* **149**, 63-74, doi:10.1016/S0022-5193(05)80072-4 (1991).
- 602 9 Simms, E. L. & Taylor, D. L. Partner Choice in Nitrogen-Fixation Mutualisms of Legumes and Rhizobia1.  
603 *Integrative and Comparative Biology* **42**, 369-380, doi:10.1093/icb/42.2.369 (2002).

- 604 10 Wang, D., Yang, S., Tang, F. & Zhu, H. Symbiosis specificity in the legume – rhizobial mutualism. *Cellular*  
605 *Microbiology* **14**, 334-342, doi:10.1111/j.1462-5822.2011.01736.x (2012).
- 606 11 Lim, S. J. & Bordenstein, S. R. An introduction to phylosymbiosis. *Proceedings of the Royal Society B:*  
607 *Biological Sciences* **287**, 20192900, doi:10.1098/rspb.2019.2900 (2020).
- 608 12 Liu, L., HUANG, X., ZHANG, R., JIANG, L. & QIAO, G. Phylogenetic congruence between Mollitrichosiphum  
609 (Aphididae: Greenideinae) and Buchnera indicates insect–bacteria parallel evolution. *Systematic*  
610 *Entomology* **38**, 81-92, doi:10.1111/j.1365-3113.2012.00647.x (2013).
- 611 13 Funk, D. J., Helbling, L., Wernegreen, J. J. & Moran, N. A. Intraspecific phylogenetic congruence among  
612 multiple symbiont genomes. *Proceedings of the Royal Society of London. Series B: Biological Sciences* **267**,  
613 2517-2521, doi:10.1098/rspb.2000.1314 (2000).
- 614 14 Manzano-Marín, A. *et al.* Serial horizontal transfer of vitamin-biosynthetic genes enables the establishment  
615 of new nutritional symbionts in aphids' di-symbiotic systems. *The ISME Journal* **14**, 259-273,  
616 doi:10.1038/s41396-019-0533-6 (2020).
- 617 15 Rock, D. I. *et al.* Context-dependent vertical transmission shapes strong endosymbiont community structure  
618 in the pea aphid, *Acyrtosiphon pisum*. *Molecular Ecology* **27**, 2039-2056, doi:10.1111/mec.14449 (2018).
- 619 16 Symula, R. E. *et al.* Influence of Host Phylogeographic Patterns and Incomplete Lineage Sorting on Within-  
620 Species Genetic Variability in *Wigglesworthia* Species, Obligate Symbionts of Tsetse Flies. *Applied and*  
621 *Environmental Microbiology* **77**, 8400-8408, doi:10.1128/aem.05688-11 (2011).
- 622 17 Polzin, J., Arevalo, P., Nussbaumer, T., Polz Martin, F. & Bright, M. Polyclonal symbiont populations in  
623 hydrothermal vent tubeworms and the environment. *Proceedings of the Royal Society B: Biological Sciences*  
624 **286**, 20181281, doi:10.1098/rspb.2018.1281 (2019).
- 625 18 Hurtado, L. A., Mateos, M., Lutz, R. A. & Vrijenhoek, R. C. Coupling of Bacterial Endosymbiont and Host  
626 Mitochondrial Genomes in the Hydrothermal Vent Clam *Calyptogena magnifica*. *Applied and Environmental*  
627 *Microbiology* **69**, 2058-2064, doi:10.1128/aem.69.4.2058-2064.2003 (2003).
- 628 19 Stewart, F. J., Young, C. R. & Cavanaugh, C. M. Lateral Symbiont Acquisition in a Maternally Transmitted  
629 Chemosynthetic Clam Endosymbiosis. *Molecular Biology and Evolution* **25**, 673-687,  
630 doi:10.1093/molbev/msn010 (2008).
- 631 20 Stewart, F. J. & Cavanaugh, C. M. Pyrosequencing analysis of endosymbiont population structure: co-  
632 occurrence of divergent symbiont lineages in a single vesicomid host clam. *Environmental Microbiology* **11**,  
633 2136-2147, doi:10.1111/j.1462-2920.2009.01933.x (2009).
- 634 21 Russell, S. L., Corbett-Detig, R. B. & Cavanaugh, C. M. Mixed transmission modes and dynamic genome  
635 evolution in an obligate animal-bacterial symbiosis. *ISME J* **11**, doi:10.1038/ismej.2017.10 (2017).
- 636 22 Koehler, S. *et al.* The model squid–vibrio symbiosis provides a window into the impact of strain- and  
637 species-level differences during the initial stages of symbiont engagement. *Environmental Microbiology* **21**,  
638 3269-3283, doi:10.1111/1462-2920.14392 (2019).
- 639 23 Pollock, F. J. *et al.* Coral-associated bacteria demonstrate phylosymbiosis and cophylogeny. *Nature*  
640 *Communications* **9**, 4921, doi:10.1038/s41467-018-07275-x (2018).
- 641 24 O'Brien, P. A. *et al.* Diverse coral reef invertebrates exhibit patterns of phylosymbiosis. *The ISME Journal* **14**,  
642 2211-2222, doi:10.1038/s41396-020-0671-x (2020).
- 643 25 Brooks, A. W., Kohl, K. D., Brucker, R. M., van Opstal, E. J. & Bordenstein, S. R. Phylosymbiosis: Relationships  
644 and Functional Effects of Microbial Communities across Host Evolutionary History. *PLOS Biology* **14**,  
645 e2000225, doi:10.1371/journal.pbio.2000225 (2016).
- 646 26 Leigh, B. A. *et al.* Finer-Scale Phylosymbiosis: Insights from Insect Viromes. *mSystems* **3**, e00131-00118,  
647 doi:10.1128/mSystems.00131-18 (2018).
- 648 27 Tinker, K. A. & Ottesen, E. A. Phylosymbiosis across Deeply Diverging Lineages of Omnivorous Cockroaches  
649 (Order Blattodea). *Applied and environmental microbiology* **86**, e02513-02519, doi:10.1128/AEM.02513-19  
650 (2020).
- 651 28 Gaulke, C. A. *et al.* Ecophylogenetics Clarifies the Evolutionary Association between Mammals and Their Gut  
652 Microbiota. *mBio* **9**, e01348-01318, doi:10.1128/mBio.01348-18 (2018).
- 653 29 Ley, R. E. *et al.* Evolution of Mammals and Their Gut Microbes. *Science* **320**, 1647-1651,  
654 doi:10.1126/science.1155725 (2008).
- 655 30 Groussin, M. *et al.* Unraveling the processes shaping mammalian gut microbiomes over evolutionary time.  
656 *Nature Communications* **8**, 14319, doi:10.1038/ncomms14319 (2017).
- 657 31 Kohl, K. D., Varner, J., Wilkening, J. L. & Dearing, M. D. Gut microbial communities of American pikas  
658 (*Ochotona princeps*): Evidence for phylosymbiosis and adaptations to novel diets. *Journal of Animal Ecology*  
659 **87**, 323-330, doi:10.1111/1365-2656.12692 (2018).
- 660 32 Cross, K. L. *et al.* Genomes of Gut Bacteria from *Nasonia* Wasps Shed Light on Phylosymbiosis and Microbe-  
661 Assisted Hybrid Breakdown. *mSystems* **6**, e01342-01320, doi:10.1128/mSystems.01342-20 (2021).

- 662 33 Qin, M., Chen, J., Xu, S., Jiang, L. & Qiao, G. Microbiota associated with Mollitrichosiphum aphids  
663 (Hemiptera: Aphididae: Greenideinae): diversity, host species specificity and phylosymbiosis. *Environmental*  
664 *Microbiology* **23**, 2184-2198, doi:10.1111/1462-2920.15391 (2021).
- 665 34 Foster, K. R., Schluter, J., Coyte, K. Z. & Rakoff-Nahoum, S. The evolution of the host microbiome as an  
666 ecosystem on a leash. *Nature* **548**, 43-51, doi:10.1038/nature23292 (2017).
- 667 35 Erséus, C., Wetzel, M. J. & Gustavsson, L. ICZN rules—a farewell to Tubificidae (Annelida, Clitellata). *Zootaxa*  
668 **1744**, 66-68, doi:10.11646/zootaxa.1744.1.7 (2008).
- 669 36 Dubilier, N. *et al.* Endosymbiotic sulphate-reducing and sulphide-oxidizing bacteria in an oligochaete worm.  
670 *Nature* **411**, 298-302, doi:10.1038/35077067 (2001).
- 671 37 Woyke, T. *et al.* Symbiosis insights through metagenomic analysis of a microbial consortium. *Nature* **443**,  
672 950-955, doi:10.1038/nature05192 (2006).
- 673 38 Kleiner, M. *et al.* Metaproteomics of a gutless marine worm and its symbiotic microbial community reveal  
674 unusual pathways for carbon and energy use. *Proceedings of the National Academy of Sciences* **109**, E1173–  
675 E1182, doi:10.1073/pnas.1121198109 (2012).
- 676 39 Ruehland, C. *et al.* Multiple bacterial symbionts in two species of co-occurring gutless oligochaete worms  
677 from Mediterranean sea grass sediments. *Environmental Microbiology* **10**, 3404-3416, doi:10.1111/j.1462-  
678 2920.2008.01728.x (2008).
- 679 40 Blazejak, A., Erséus, C., Amann, R. & Dubilier, N. Coexistence of Bacterial Sulfide Oxidizers, Sulfate Reducers,  
680 and Spirochetes in a Gutless Worm (Oligochaeta) from the Peru Margin. *Applied and Environmental*  
681 *Microbiology* **71**, 1553-1561, doi:10.1128/aem.71.3.1553-1561.2005 (2005).
- 682 41 Blazejak, A., Kuever, J., Erséus, C., Amann, R. & Dubilier, N. Phylogeny of 16S rRNA, Ribulose 1,5-  
683 Bisphosphate Carboxylase/Oxygenase, and Adenosine 5' -Phosphosulfate Reductase Genes from Gamma-  
684 and Alphaproteobacterial Symbionts in Gutless Marine Worms (Oligochaeta) from Bermuda and the  
685 Bahamas. *Applied and Environmental Microbiology* **72**, 5527-5536, doi:10.1128/aem.02441-05 (2006).
- 686 42 Giere, O. The gutless marine oligochaete Phallo-drilus leukodermatus. Structural studies on an aberrant  
687 tubificid associated with bacteria. *Marine Ecology Progress Series* **5**, 353-357 (1981).
- 688 43 Bright, M. & Giere, O. Microbial symbiosis in Annelida. *Symbiosis* **38**, 1-45 (2005).
- 689 44 Erséus, C. *et al.* Phylogenomic analyses reveal a Palaeozoic radiation and support a freshwater origin for  
690 clitellate annelids. *Zoologica Scripta* **49**, 614-640, doi:10.1111/zsc.12426 (2020).
- 691 45 Kleiner, M. *et al.* Use of carbon monoxide and hydrogen by a bacteria–animal symbiosis from seagrass  
692 sediments. *Environmental Microbiology* **17**, 5023-5035, doi:10.1111/1462-2920.12912 (2015).
- 693 46 Giere, O. & Langheld, C. Structural organisation, transfer and biological fate of endosymbiotic bacteria in  
694 gutless oligochaetes. *Marine Biology* **93**, 641-650, doi:10.1007/BF00392801 (1987).
- 695 47 Giere, O. Ecology and Biology of Marine Oligochaeta – an Inventory Rather than another Review.  
696 *Hydrobiologia* **564**, 103-116, doi:10.1007/s10750-005-1712-1 (2006).
- 697 48 Schimak, M.-P. *Transmission of bacterial symbionts in the gutless oligochaete Olavius algarvensis*, University  
698 of Bremen, (2016).
- 699 49 Zimmermann, J. *et al.* Closely coupled evolutionary history of ecto- and endosymbionts from two distantly  
700 related animal phyla. *Molecular Ecology* **25**, 3203-3223, doi:10.1111/mec.13554 (2016).
- 701 50 Bergin, C. *et al.* Acquisition of a Novel Sulfur-Oxidizing Symbiont in the Gutless Marine Worm *Inanidrilus*  
702 *exumae*. *Applied and Environmental Microbiology* **84**, doi:10.1128/aem.02267-17 (2018).
- 703 51 Sato, Y., Wippler, J., Wentrup, C., Dubilier, N. & Kleiner, M. High-Quality Draft Genome Sequences of Two  
704 Deltaproteobacterial Endosymbionts, Delta1a and Delta1b, from the Uncultured Sva0081 Clade, Assembled  
705 from Metagenomes of the Gutless Marine Worm *Olavius algarvensis*. *Microbiology Resource*  
706 *Announcements* **9**, e00276-00220, doi:10.1128/mra.00276-20 (2020).
- 707 52 Sato, Y. *et al.* High-Quality Draft Genome Sequences of the Uncultured Delta3 Endosymbiont  
708 (*Deltaproteobacteria*) Assembled from Metagenomes of the Gutless Marine Worm *Olavius algarvensis*.  
709 *Microbiology Resource Announcements* **9**, e00704-00720, doi:10.1128/mra.00704-20 (2020).
- 710 53 Kleiner, M., Woyke, T., Ruehland, C. & Dubilier, N. in *Handbook of Molecular Microbial Ecology II* (ed Frans  
711 J. de Bruijn) Ch. 32, 319-333 (Wiley-Blackwell, 2011).
- 712 54 Kleiner, M. *et al.* Metaproteomics method to determine carbon sources and assimilation pathways of  
713 species in microbial communities. *Proceedings of the National Academy of Sciences* **115**, E5576-E5584,  
714 doi:10.1073/pnas.1722325115 (2018).
- 715 55 Wippler, J. *et al.* Transcriptomic and proteomic insights into innate immunity and adaptations to a  
716 symbiotic lifestyle in the gutless marine worm *Olavius algarvensis*. *BMC Genomics* **17**, 942,  
717 doi:10.1186/s12864-016-3293-y (2016).



- 718 56 Bruijning, M., Henry, L. P., Forsberg, S. K. G., Metcalf, C. J. E. & Ayroles, J. F. When the microbiome defines  
719 the host phenotype: selection on vertical transmission in varying environments. *bioRxiv*,  
720 2020.2009.2002.280040, doi:10.1101/2020.09.02.280040 (2020).
- 721 57 Nielsen, R., Korneliussen, T., Albrechtsen, A., Li, Y. & Wang, J. SNP Calling, Genotype Calling, and Sample  
722 Allele Frequency Estimation from New-Generation Sequencing Data. *PLOS ONE* **7**, e37558,  
723 doi:10.1371/journal.pone.0037558 (2012).
- 724 58 Vieira, F. G., Lassalle, F., Korneliussen, T. S. & Fumagalli, M. Improving the estimation of genetic distances  
725 from Next-Generation Sequencing data. *Biological Journal of the Linnean Society* **117**, 139-149,  
726 doi:10.1111/bij.12511 (2016).
- 727 59 Robidart, J. C. *et al.* Metabolic versatility of the *Riftia pachyptila* endosymbiont revealed through  
728 metagenomics. *Environmental Microbiology* **10**, 727-737, doi:10.1111/j.1462-2920.2007.01496.x (2008).
- 729 60 Ansorge, R. *et al.* Functional diversity enables multiple symbiont strains to coexist in deep-sea mussels.  
730 *Nature Microbiology* **4**, 2487-2497, doi:10.1038/s41564-019-0572-9 (2019).
- 731 61 Andreu-Sánchez, S. *et al.* A Benchmark of Genetic Variant Calling Pipelines Using Metagenomic Short-Read  
732 Sequencing. *Frontiers in Genetics* **12**, doi:10.3389/fgene.2021.648229 (2021).
- 733 62 Husnik, F. & McCutcheon, J. P. Repeated replacement of an intrabacterial symbiont in the tripartite nested  
734 mealybug symbiosis. *Proceedings of the National Academy of Sciences* **113**, E5416-E5424,  
735 doi:10.1073/pnas.1603910113 (2016).
- 736 63 Toenshoff, E. R., Gruber, D. & Horn, M. Co-evolution and symbiont replacement shaped the symbiosis  
737 between adelgids (Hemiptera: Adelgidae) and their bacterial symbionts. *Environmental Microbiology* **14**,  
738 1284-1295, doi:10.1111/j.1462-2920.2012.02712.x (2012).
- 739 64 Koga, R., Bennett, G. M., Cryan, J. R. & Moran, N. A. Evolutionary replacement of obligate symbionts in an  
740 ancient and diverse insect lineage. *Environmental Microbiology* **15**, 2073-2081, doi:10.1111/1462-  
741 2920.12121 (2013).
- 742 65 Moran, N. A., McCutcheon, J. P. & Nakabachi, A. Genomics and Evolution of Heritable Bacterial Symbionts.  
743 *Annual Review of Genetics* **42**, 165-190, doi:10.1146/annurev.genet.41.110306.130119 (2008).
- 744 66 Dubilier, N. *et al.* Phylogenetic diversity of bacterial endosymbionts in the gutless marine oligochete *Olavius*  
745 *loisae* (Annelida). *Marine Ecology Progress Series* **178**, 271-280, doi:10.3354/meps178271 (1999).
- 746 67 Herrera, M. *et al.* Temperature transcends partner specificity in the symbiosis establishment of a cnidarian.  
747 *The ISME Journal* **15**, 141-153, doi:10.1038/s41396-020-00768-y (2021).
- 748 68 Sudakaran, S., Kost, C. & Kaltenpoth, M. Symbiont Acquisition and Replacement as a Source of Ecological  
749 Innovation. *Trends in Microbiology* **25**, 375-390, doi:10.1016/j.tim.2017.02.014 (2017).
- 750 69 Leftwich, P. T., Edgington, M. P. & Chapman, T. Transmission efficiency drives host-microbe associations.  
751 *Proceedings of the Royal Society B: Biological Sciences* **287**, 20200820, doi:10.1098/rspb.2020.0820 (2020).
- 752 70 Salem, H., Florez, L., Gerardo, N. & Kaltenpoth, M. An out-of-body experience: the extracellular dimension  
753 for the transmission of mutualistic bacteria in insects. *Proceedings of the Royal Society B: Biological Sciences*  
754 **282**, 20142957, doi:10.1098/rspb.2014.2957 (2015).
- 755 71 Elena, S. F. & Lenski, R. E. Evolution experiments with microorganisms: the dynamics and genetic bases of  
756 adaptation. *Nature Reviews Genetics* **4**, 457-469, doi:10.1038/nrg1088 (2003).
- 757 72 Henry, L. P., Bruijning, M., Forsberg, S. K. G. & Ayroles, J. F. The microbiome extends host evolutionary  
758 potential. *Nature Communications* **12**, 5141, doi:10.1038/s41467-021-25315-x (2021).
- 759 73 Olofsson, H., Ripa, J. & Jonzén, N. Bet-hedging as an evolutionary game: the trade-off between egg size and  
760 number. *Proceedings of the Royal Society B: Biological Sciences* **276**, 2963-2969,  
761 doi:10.1098/rspb.2009.0500 (2009).
- 762 74 Childs, D. Z., Metcalf, C. J. E. & Rees, M. Evolutionary bet-hedging in the real world: empirical evidence and  
763 challenges revealed by plants. *Proceedings of the Royal Society B: Biological Sciences* **277**, 3055-3064,  
764 doi:10.1098/rspb.2010.0707 (2010).
- 765 75 Van Rossum, T., Ferretti, P., Maistrenko, O. M. & Bork, P. Diversity within species: interpreting strains in  
766 microbiomes. *Nature Reviews Microbiology* **18**, 491-506, doi:10.1038/s41579-020-0368-1 (2020).
- 767 76 Russell, S. L. Transmission mode is associated with environment type and taxa across bacteria-eukaryote  
768 symbioses: a systematic review and meta-analysis. *FEMS Microbiology Letters* **366**, fnz013,  
769 doi:10.1093/femsle/fnz013 (2019).
- 770 77 Bobay, L.-M., Wissel, E. F. & Raymann, K. Strain Structure and Dynamics Revealed by Targeted Deep  
771 Sequencing of the Honey Bee Gut Microbiome. *mSphere* **5**, e00694-00620, doi:10.1128/mSphere.00694-20  
772 (2020).
- 773 78 Hildebrand, F. *et al.* Dispersal strategies shape persistence and evolution of human gut bacteria. *Cell Host &*  
774 *Microbe* **29**, 1167-1176.e1169, doi:10.1016/j.chom.2021.05.008 (2021).

- 775 79 Thomas, T. *et al.* Diversity, structure and convergent evolution of the global sponge microbiome. *Nature*  
776 *Communications* **7**, 11870, doi:10.1038/ncomms11870 (2016).
- 777 80 Campbell, T. P. *et al.* The microbiome and resistome of chimpanzees, gorillas, and humans across host  
778 lifestyle and geography. *The ISME Journal* **14**, 1584-1599, doi:10.1038/s41396-020-0634-2 (2020).
- 779 81 Ferrari, J. & Vavre, F. Bacterial symbionts in insects or the story of communities affecting communities.  
780 *Philosophical Transactions of the Royal Society B: Biological Sciences* **366**, 1389-1400,  
781 doi:10.1098/rstb.2010.0226 (2011).
- 782 82 Drew, G. C. *et al.* Transitions in symbiosis: evidence for environmental acquisition and social transmission  
783 within a clade of heritable symbionts. *The ISME Journal* **15**, 2956–2968, doi:10.1038/s41396-021-00977-z  
784 (2021).
- 785 83 Monnin, D. *et al.* Parallel Evolution in the Integration of a Co-obligate Aphid Symbiosis. *Current Biology* **30**,  
786 1949-1957.e1946, doi:10.1016/j.cub.2020.03.011 (2020).
- 787 84 Folmer, O., Black, M., Hoeh, W., Lutz, R. & Vrijenhoek, R. DNA primers for amplification of mitochondrial  
788 cytochrome c oxidase subunit I from diverse metazoan invertebrates. *Molecular marine biology and*  
789 *biotechnology* **3**, 294-299 (1994).
- 790 85 Katoh, K. & Standley, D. M. MAFFT Multiple Sequence Alignment Software Version 7: Improvements in  
791 Performance and Usability. *Molecular Biology and Evolution* **30**, 772-780, doi:10.1093/molbev/mst010  
792 (2013).
- 793 86 Clement, M., Posada, D. & Crandall, K. A. TCS: a computer program to estimate gene genealogies. *Mol Ecol*  
794 **9**, 1657-1659 (2000).
- 795 87 Leigh, J. W. & Bryant, D. popart: full-feature software for haplotype network construction. *Methods in*  
796 *Ecology and Evolution* **6**, 1110-1116, doi:10.1111/2041-210X.12410 (2015).
- 797 88 Hennig, B. P. *et al.* Large-Scale Low-Cost NGS Library Preparation Using a Robust Tn5 Purification and  
798 Tagmentation Protocol. *G3 (Bethesda, Md.)* **8**, 79-89, doi:10.1534/g3.117.300257 (2018).
- 799 89 Nikolenko, S. I., Korobeynikov, A. I. & Alekseyev, M. A. BayesHammer: Bayesian clustering for error  
800 correction in single-cell sequencing. *BMC Genomics* **14**, S7, doi:10.1186/1471-2164-14-s1-s7 (2013).
- 801 90 Bankevich, A. *et al.* SPAdes: a new genome assembly algorithm and its applications to single-cell  
802 sequencing. *Journal of computational biology : a journal of computational molecular cell biology* **19**, 455-  
803 477, doi:10.1089/cmb.2012.0021 (2012).
- 804 91 Li, D. *et al.* MEGAHIT v1.0: A fast and scalable metagenome assembler driven by advanced methodologies  
805 and community practices. *Methods* **102**, 3-11, doi:10.1016/j.ymeth.2016.02.020 (2016).
- 806 92 Kang, D. D., Froula, J., Egan, R. & Wang, Z. MetaBAT, an efficient tool for accurately reconstructing single  
807 genomes from complex microbial communities. *PeerJ* **3**, e1165-e1165, doi:10.7717/peerj.1165 (2015).
- 808 93 Wick, R. R., Schultz, M. B., Zobel, J. & Holt, K. E. Bandage: interactive visualization of de novo genome  
809 assemblies. *Bioinformatics* **31**, 3350-3352, doi:10.1093/bioinformatics/btv383 (2015).
- 810 94 Parks, D. H., Imelfort, M., Skennerton, C. T., Hugenholtz, P. & Tyson, G. W. CheckM: assessing the quality of  
811 microbial genomes recovered from isolates, single cells, and metagenomes. *Genome Research* **25**, 1043-  
812 1055, doi:10.1101/gr.186072.114 (2015).
- 813 95 Gurevich, A., Saveliev, V., Vyahhi, N. & Tesler, G. QUAST: quality assessment tool for genome assemblies.  
814 *Bioinformatics* **29**, 1072-1075, doi:10.1093/bioinformatics/btt086 (2013).
- 815 96 Xu, H. *et al.* FastUniq: A Fast De Novo Duplicates Removal Tool for Paired Short Reads. *PLOS ONE* **7**, e52249,  
816 doi:10.1371/journal.pone.0052249 (2012).
- 817 97 Bolger, A. M., Lohse, M. & Usadel, B. Trimmomatic: a flexible trimmer for Illumina sequence data.  
818 *Bioinformatics (Oxford, England)* **30**, 2114-2120, doi:10.1093/bioinformatics/btu170 (2014).
- 819 98 Hahn, C., Bachmann, L. & Chevreur, B. Reconstructing mitochondrial genomes directly from genomic next-  
820 generation sequencing reads—a baiting and iterative mapping approach. *Nucleic Acids Research* **41**, e129-  
821 e129, doi:10.1093/nar/gkt371 (2013).
- 822 99 Bernt, M. *et al.* MITOS: Improved de novo metazoan mitochondrial genome annotation. *Molecular*  
823 *Phylogenetics and Evolution* **69**, 313-319, doi:10.1016/j.ympev.2012.08.023 (2013).
- 824 100 Gruber-Vodicka, H. R., Seah, B. K. B. & Pruesse, E. phyloFlash: Rapid Small-Subunit rRNA Profiling and  
825 Targeted Assembly from Metagenomes. *mSystems* **5**, e00920-00920, doi:10.1128/mSystems.00920-20  
826 (2020).
- 827 101 Quast, C. *et al.* The SILVA ribosomal RNA gene database project: improved data processing and web-based  
828 tools. *Nucleic Acids Research* **41**, D590-D596, doi:10.1093/nar/gks1219 (2012).
- 829 102 Li, W. & Godzik, A. CD-HIT: A fast program for clustering and comparing large sets of protein or nucleotide  
830 sequences. *Bioinformatics* **22**, 1658-1659, doi:10.1093/bioinformatics/btl158 (2006).
- 831 103 Bray, N. L., Pimentel, H., Melsted, P. & Pachter, L. Near-optimal probabilistic RNA-seq quantification. *Nature*  
832 *Biotechnology* **34**, 525, doi:10.1038/nbt.3519 (2016).

833 104 Wickham, H. *ggplot2: Elegant Graphics for Data Analysis*. (Springer-Verlag, 2016).  
834 105 Zischler, H., Geisert, H., von Haeseler, A. & Pääbo, S. A nuclear 'fossil' of the mitochondrial D-loop and the  
835 origin of modern humans. *Nature* **378**, 489-492, doi:10.1038/378489a0 (1995).  
836 106 Li, H. *et al.* The sequence alignment/map format and SAMtools. *Bioinformatics* **25**, 2078-2079,  
837 doi:10.1093/bioinformatics/btp352 (2009).  
838 107 Jun, G., Wing, M. K., Abecasis, G. R. & Kang, H. M. An efficient and scalable analysis framework for variant  
839 extraction and refinement from population-scale DNA sequence data. *Genome Research* **25**, 918-925,  
840 doi:10.1101/gr.176552.114 (2015).  
841 108 McKenna, A. *et al.* The Genome Analysis Toolkit: a MapReduce framework for analyzing next-generation  
842 DNA sequencing data. *Genome Research* **20**, 1297-1303, doi:10.1101/gr.107524.110 (2010).  
843 109 Korneliussen, T. S., Albrechtsen, A. & Nielsen, R. ANGSD: Analysis of Next Generation Sequencing Data. *BMC*  
844 *Bioinformatics* **15**, 356, doi:10.1186/s12859-014-0356-4 (2014).  
845 110 Fuentes-Pardo, A. P. & Ruzzante, D. E. Whole-genome sequencing approaches for conservation biology:  
846 Advantages, limitations and practical recommendations. *Molecular Ecology* **26**, 5369-5406,  
847 doi:10.1111/mec.14264 (2017).  
848 111 Fumagalli, M., Vieira, F. G., Linderoth, T. & Nielsen, R. ngsTools: methods for population genetics analyses  
849 from next-generation sequencing data. *Bioinformatics* **30**, 1486-1487, doi:10.1093/bioinformatics/btu041  
850 (2014).  
851 112 Lefort, V., Desper, R. & Gascuel, O. FastME 2.0: A Comprehensive, Accurate, and Fast Distance-Based  
852 Phylogeny Inference Program. *Molecular Biology and Evolution* **32**, 2798-2800,  
853 doi:10.1093/molbev/msv150 (2015).  
854 113 Stamatakis, A. RAxML version 8: a tool for phylogenetic analysis and post-analysis of large phylogenies.  
855 *Bioinformatics* **30**, 1312-1313, doi:10.1093/bioinformatics/btu033 (2014).  
856 114 R Core Team. *R: A language and environment for statistical computing*. (R Foundation for Statistical  
857 Computing, 2016).  
858 115 Ogle, D. *Introductory Fisheries Analyses with R*. 1-337 (Chapman and Hall/CRC, 2016).  
859 116 Oksanen, J. *et al.* vegan: Community Ecology Package. R package version 2.4-4. [https://CRAN.R-](https://CRAN.R-project.org/package=vegan)  
860 [project.org/package=vegan](https://CRAN.R-project.org/package=vegan) (2017).  
861
